# Supplementary material for: Reversible ammonia uptake at room temperature in a robust and tunable metal–organic framework
Source: Royal Society of Chemistry journal article supplement (doi:10.1039/d2ra01270g), 2022-01-01
Supplement: d2ra01270g1.pdf [file d2ra01270g1.pdf]

## Supporting Information

### Reversible ammonia uptake at room temperature in a robust and tunable metal-organic framework

Jaechul Lee,<sup>a‡</sup> Younggyu Seo,<sup>a‡</sup> Dong Won Kang,<sup>b</sup> Seungjae Park,<sup>a</sup> Hyunyong Kim,<sup>a</sup> Jaheon Kim,<sup>c</sup> Kimoon Kim,<sup>ade</sup> Chang Seop Hong,<sup>\*b</sup> Dae-Woon Lim,<sup>\*fg</sup> Eunsung Lee<sup>\*ad</sup>

<sup>a</sup> Department of Chemistry, Pohang University of Science and Technology (POSTECH), Pohang, 37673, Republic of Korea

<sup>b</sup> Department of Chemistry, Korea University, Seoul 02841, Republic of Korea

<sup>c</sup> Department of Chemistry, Soongsil University, Seoul 06978, Republic of Korea

<sup>d</sup> Division of Advanced Materials Science, Pohang University of Science and Technology, Pohang 37673, Republic of Korea

<sup>e</sup> Center for Self-assembly and Complexity, Institute for Basic Science (IBS), Pohang 37673, Republic of Korea

<sup>f</sup> Department of Chemistry, Graduate School of Science, Kyoto University, Kitashirakawa Oiwakecho, Sakyo-ku, Kyoto 606-8502, Japan

<sup>g</sup> Department of Chemistry and Medical Chemistry, Yonsei University, Wonju, 26493, Republic of Korea

**Abstract:** Ammonia is the second most-produced chemical in the world, but the effective removal of ammonia from atmosphere is also important because of its high toxicity and corrosiveness. Although metal-organic frameworks (MOFs) have emerged as a strong candidate for NH<sub>3</sub> adsorbents, most of MOFs suffer from a lack of stability and high regeneration temperatures. Here, we report the recyclable and tunable ammonia adsorption using a robust imidazolium-based MOF (**JCM-1**). **JCM-1** shows reversible NH<sub>3</sub> uptake which can be easily regenerated at room temperature without any structural deformation. Furthermore, we demonstrated the control of NH<sub>3</sub> adsorption affinity and uptake capacity of **JCM-1** by simple ion substitution in a post-synthetic manner. To understand the anion effect on NH<sub>3</sub> sorption in **JCM-1**, interaction energies of the frameworks toward NH<sub>3</sub> before and after ion substitution were simulated by density functional theory (DFT) calculations.

## Table of Contents

|                                                                                            |    |
|--------------------------------------------------------------------------------------------|----|
| Crystal structure of <b>JCM-1</b> .....                                                    | 3  |
| Single crystal structure of <b>JCM-1(Cl)</b> .....                                         | 3  |
| DFT calculations .....                                                                     | 6  |
| - Standard interaction enthalpy of <b>JCM-1</b> with an NH <sub>3</sub> molecule .....     | 6  |
| - Standard interaction enthalpy of <b>JCM-1(Cl)</b> with an NH <sub>3</sub> molecule ..... | 6  |
| - Coordinates of optimized structures.....                                                 | 7  |
| IR analysis .....                                                                          | 16 |
| Breakthrough experiments.....                                                              | 17 |
| References .....                                                                           | 22 |

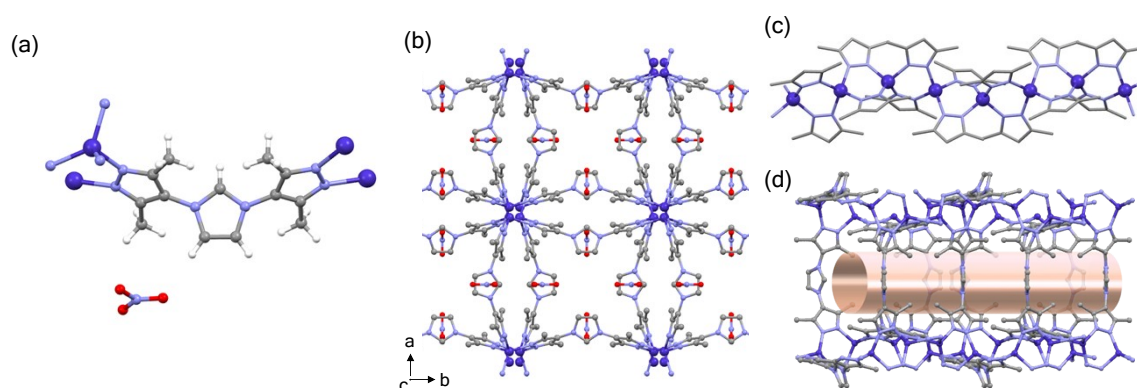

### Crystal structure of JCM-1

**Fig. S1** a) Repeating unit of **JCM-1** with  $\text{Co}^{\text{II}}$  nodes connected by the ligands b) The view of the crystal structure of **JCM-1** along the  $c$  axis. c) A perpendicular view of pyrazolate-bridged 4-fold helical cobalt $^{\text{II}}$  chain. d) imidazolium-aligned channel of **JCM-1** along the  $c$  axis. Nitrate anions and hydrogen atoms are omitted for clarity in Fig S1c and d.

### Single crystal structure of JCM-1(Cl $^-$ )

In the crystal structure of **JCM-1(Cl $^-$ )**, chloride anion was successfully assigned as below. Chloride looks to form weak hydrogen bonding interactions with three nearby protons from three imidazolium rings. (See supplementary crystal data for further details)

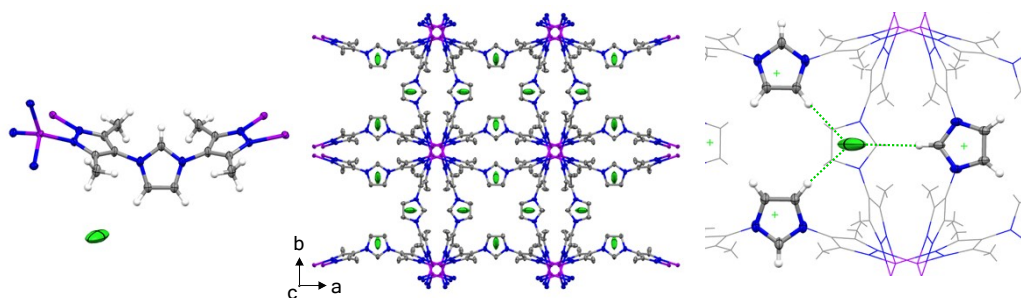

**Fig. S2** Single crystal structure of **JCM-1(Cl $^-$ )**.

| <b>Table S1. Crystal data and structure refinement for JCM-1(Cl)</b> |                                                               |
|----------------------------------------------------------------------|---------------------------------------------------------------|
| Identification code                                                  | I41amd_80                                                     |
| Empirical formula                                                    | C <sub>13</sub> H <sub>15</sub> ClCoN <sub>6</sub>            |
| Formula weight                                                       | 349.69                                                        |
| Temperature/K                                                        | 173(2)                                                        |
| Crystal system                                                       | tetragonal                                                    |
| Space group                                                          | I4 <sub>1</sub> /amd                                          |
| a/Å                                                                  | 23.354(3)                                                     |
| b/Å                                                                  | 23.354(3)                                                     |
| c/Å                                                                  | 13.117(3)                                                     |
| α/°                                                                  | 90                                                            |
| β/°                                                                  | 90                                                            |
| γ/°                                                                  | 90                                                            |
| Volume/Å <sup>3</sup>                                                | 7154(3)                                                       |
| Z                                                                    | 16                                                            |
| ρ <sub>calc</sub> /cm <sup>3</sup>                                   | 1.299                                                         |
| μ/mm <sup>-1</sup>                                                   | 1.110                                                         |
| F(000)                                                               | 2864.0                                                        |
| Crystal size/mm <sup>3</sup>                                         | 0.02 × 0.01 × 0.005                                           |
| Radiation                                                            | MoKα (λ = 0.71073)                                            |
| 2θ range for data collection/°                                       | 3.562 to 52.742                                               |
| Index ranges                                                         | -29 ≤ h ≤ 29, -29 ≤ k ≤ 29, -16 ≤ l ≤ 16                      |
| Reflections collected                                                | 27574                                                         |
| Independent reflections                                              | 1927 [R <sub>int</sub> = 0.0742, R <sub>sigma</sub> = 0.0256] |
| Data/restraints/parameters                                           | 1927/0/101                                                    |
| Goodness-of-fit on F <sup>2</sup>                                    | 1.122                                                         |
| Final R indexes [I ≥ 2σ (I)]                                         | R <sub>1</sub> = 0.0716, wR <sub>2</sub> = 0.2286             |
| Final R indexes [all data]                                           | R <sub>1</sub> = 0.0806, wR <sub>2</sub> = 0.2377             |
| Largest diff. peak/hole / e Å <sup>-3</sup>                          | 1.00/-0.86                                                    |

### Isosteric heat of sorption

The fitting parameters of each sorption isotherm are summarized in Table S3. Overall fitting quality was still good as evidenced by  $R^2$  values greater than 0.997.

|                              | <b>JCM-1</b> | <b>JCM-1(CI)</b> |
|------------------------------|--------------|------------------|
| <b>a0</b>                    | -6695.58285  | -8747.36628      |
| <b>a1</b>                    | 335.34569    | 601.54978        |
| <b>a2</b>                    | 22.1313      | -105.10037       |
| <b>a3</b>                    | -13.60095    | 11.01191         |
| <b>a4</b>                    | 1.20E0       | -4.17E-1         |
| <b>adj. <math>R^2</math></b> | 0.9972027    | 0.9977129        |

**Table S2.** Fitted parameters by the dual-site Langmuir equation

## DFT calculations

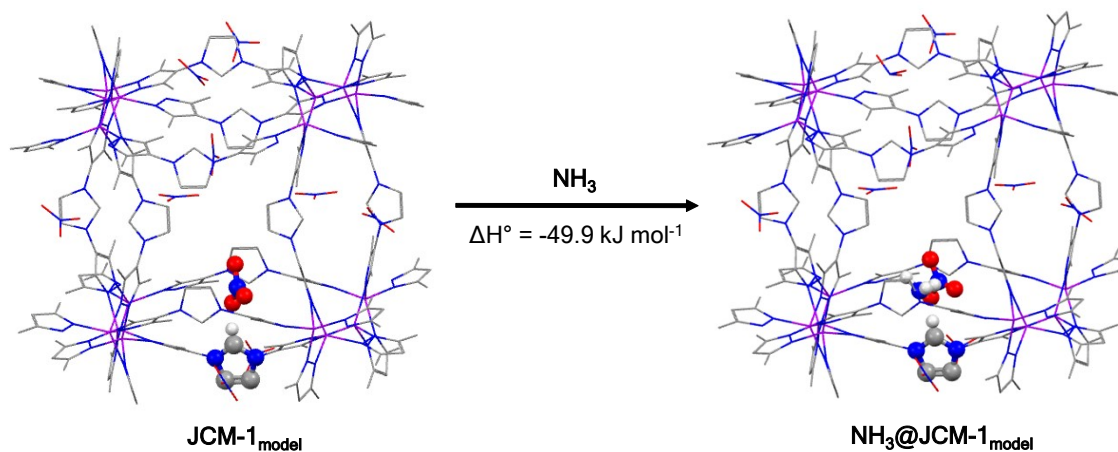

- Standard interaction enthalpy of **JCM-1** with an NH<sub>3</sub> molecule

**Fig. S3** Standard enthalpy changes calculated on the model systems of **JCM-1**.

- Standard interaction enthalpy of **JCM-1(Cl)** with an NH<sub>3</sub> molecule

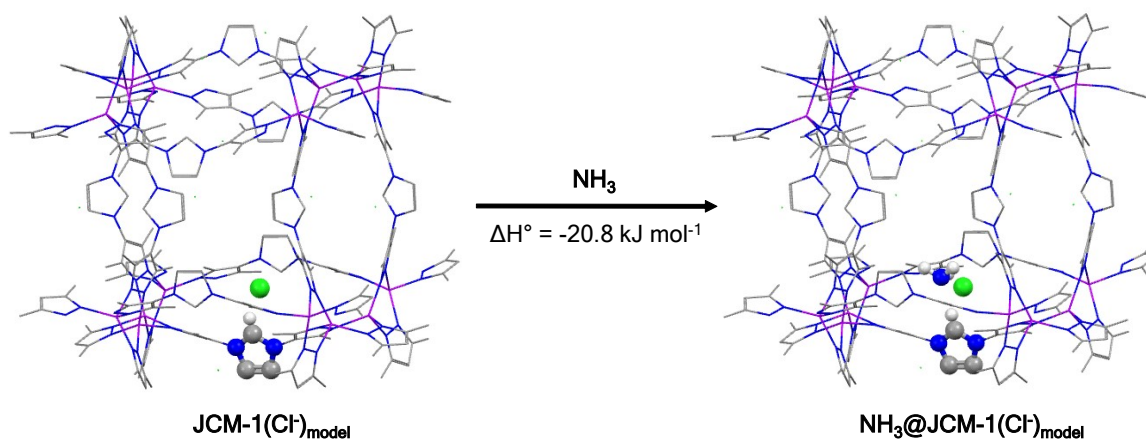

**Fig. S4** Standard enthalpy changes calculated on the model systems **JCM-1(Cl)**.

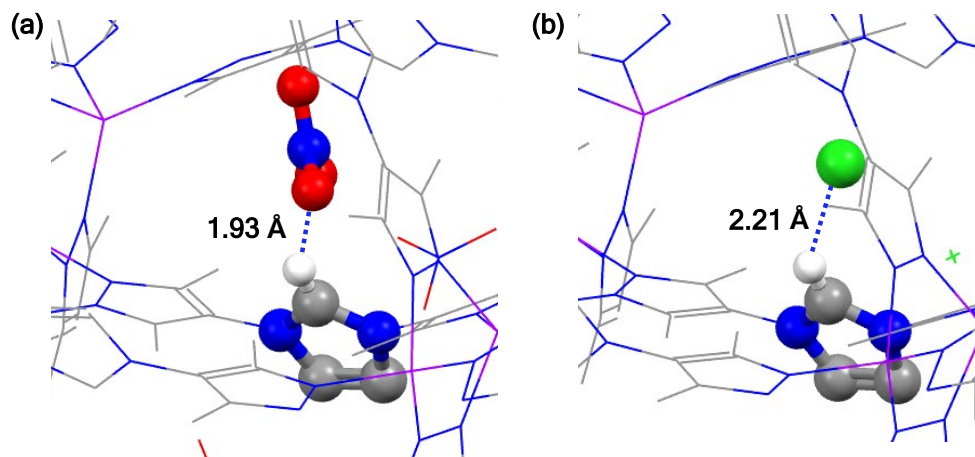

Fig. S5 Anion-imidazolium distance in the optimized structures of a) JCM-1 and b) JCM-1(Cl<sup>-</sup>).

- Coordinates of optimized structures

The following optimized geometries were displayed in Cartesian coordinates (atomic unit). E° represents the electronic energy of the optimized structure, and H° represents the sum of electronic and thermal enthalpies in Hartree unit.

Coordinates of Optimized Structures of NH<sub>3</sub> [H° = -56.519517]

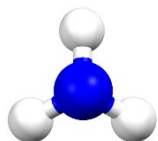

Charge = 0; Multiplicity = 1;

|   |         |         |         |
|---|---------|---------|---------|
| N | -0.1097 | -0.0055 | 0.2176  |
| H | -0.7141 | 0.6574  | -0.2635 |
| H | 0.7141  | 0.5236  | 0.4962  |
| H | 0.209   | -0.6574 | -0.4962 |

Coordinates of Optimized Structures of JCM-1 [H° = -500.158804]

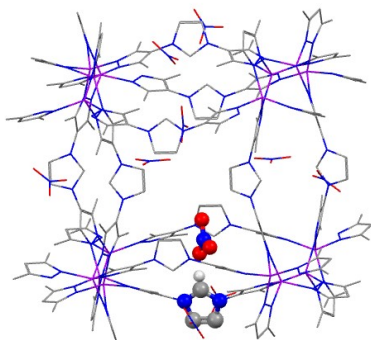

Charge = 0; Multiplicity = 1;

|   |         |         |          |   |          |        |         |   |         |        |         |   |         |         |         |
|---|---------|---------|----------|---|----------|--------|---------|---|---------|--------|---------|---|---------|---------|---------|
| C | -6.9832 | 9.8599  | -1.0375  | C | -10.0755 | 5.8418 | 2.9737  | C | -3.5635 | 7.6045 | -0.2144 | C | -9.3746 | 1.0481  | 0.7332  |
| C | -4.6789 | -3.5588 | -3.5836  | C | -9.4449  | 5.9973 | 4.3354  | C | -3.6695 | 8.2309 | 1.1551  | C | -7.3779 | 3.1337  | 3.7636  |
| C | -4.3342 | -2.8643 | -2.4425  | C | -10.0014 | 5.8262 | 5.5862  | C | 0.615   | 9.2796 | -0.4467 | C | -7.3745 | 3.5874  | 2.3247  |
| C | -4.508  | -3.7064 | -1.3714  | C | -9.0264  | 6.0877 | 6.5176  | C | 2.2826  | 6.4519 | -3.0434 | C | -7.7192 | 2.8928  | 1.1836  |
| C | -4.2824 | -3.4133 | 0.0924   | C | -9.1404  | 6.0545 | 8.0227  | C | 2.9174  | 6.8209 | -1.7253 | C | -7.5454 | 3.7348  | 0.1124  |
| C | -9.0769 | 3.1502  | -10.0691 | C | -0.0458  | 7.2041 | -0.7609 | C | 2.3771  | 7.4905 | -0.6469 | C | -7.7709 | 3.4417  | -1.3514 |
| C | -8.4462 | 3.3058  | -8.7074  | C | -0.7325  | 9.2843 | -0.5508 | C | 3.3488  | 7.5802 | 0.3198  | C | -9.4003 | -0.2757 | 1.0044  |
| C | -9.0027 | 3.1346  | -7.4566  | C | -2.001   | 6.4669 | -3.3744 | C | 9.407   | 0.3846 | 0.3846  | C | -7.4593 | -1.0746 | 4.6258  |
| C | -8.0277 | 3.3962  | -6.5252  | C | -2.8282  | 6.8411 | -2.1694 | C | -3.5758 | 6.9    | -8.5811 | C | -7.4837 | -2.0571 | 3.4812  |
| C | -8.1417 | 3.3629  | -5.0201  | C | -2.4555  | 7.5075 | -1.0203 | C | -7.4617 | 0.5154 | 1.6816  | C | -7.8111 | -1.8549 | 2.1563  |





|            |          |          |            |          |         |           |         |         |           |          |         |
|------------|----------|----------|------------|----------|---------|-----------|---------|---------|-----------|----------|---------|
| H 7.3423   | 6.8695   | 9.6349   | H 1.85     | 6.0448   | 7.9499  | N -7.2755 | -3.9774 | 2.4164  | N -3.9746 | 3.2772   | -9.0838 |
| H 8.4228   | 5.7355   | 9.6958   | H 0.5847   | 6.1966   | 7.0355  | N -0.541  | 2.2808  | -8.6673 | N -8.1426 | 6.3206   | 4.5229  |
| H 6.9069   | 5.3659   | 9.5686   | H 1.5203   | 7.4298   | 7.2943  | N 1.624   | 2.2731  | -8.5    | N 5.1574  | -4.8479  | -2.41   |
| H -10.9608 | -6.7197  | 1.9795   | H 7.2241   | -7.7252  | 8.9632  | N 4.6439  | 3.6747  | -7.1836 | N 4.8832  | -4.9313  | -1.0913 |
| H -10.0253 | -5.4865  | 2.2384   | H 7.6233   | -6.255   | 8.6028  | N 5.0878  | 3.2454  | -8.3834 | N 3.9947  | 0.5972   | -2.2484 |
| H -9.6955  | -6.8716  | 2.894    | H 6.1267   | -6.6073  | 8.9041  | N -1.5396 | 4.9723  | 4.3755  | N 5.3163  | 3.3661   | -4.0929 |
| H -10.4473 | -7.8042  | -0.4328  | H 7.1431   | 10.7313  | -0.0113 | N -4.716  | 6.3956  | 5.2129  | N 5.0555  | 3.9714   | -2.9154 |
| H -9.2359  | -8.5598  | -2.6681  | H 7.4825   | 9.2702   | -0.47   | N 0.6253  | 4.9647  | 4.5428  | N 4.4504  | -6.3215  | -5.1356 |
| H -7.7338  | -8.9056  | -2.3943  | H 5.9872   | 9.7194   | -0.3325 | N 3.6452  | 6.3663  | 5.8592  | N 7.4979  | -5.9914  | -4.0911 |
| H -8.1136  | -7.5342  | -3.0495  | H 7.5083   | 10.9327  | 2.6507  | N 4.0891  | 5.9369  | 4.6594  | N 4.9916  | -8.0741  | -2.6362 |
| H -9.2239  | -7.4167  | -8.2171  | H 6.4364   | 9.3943   | 5.6257  | N 3.9535  | -1.5298 | -1.8126 | N 6.2373  | -6.906   | 4.9348  |
| H -8.7876  | -6.0342  | -8.8135  | H 7.5749   | 10.4038  | 5.2489  | N -7.2279 | -6.8588 | 3.894   | N 6.3183  | -6.302   | 6.1387  |
| H -10.1795 | -6.1768  | -8.1043  | H 7.9165   | 8.8966   | 5.4985  | N 7.3788  | -6.6038 | 1.9842  | N -3.9108 | -6.2921  | -5.7818 |
| H -10.0352 | -5.0947  | -5.6412  | H -0.2788  | -6.0643  | 1.6502  | N 4.2029  | -6.5877 | 2.617   | N -4.1615 | -6.3833  | -7.1046 |
| H -7.6477  | -4.0111  | -3.2855  | H 0.7846   | -9.3231  | 3.6513  | N 6.5314  | -4.0259 | 3.4837  | N 0.4762  | -2.7476  | 6.1229  |
| H -8.1332  | -5.3796  | -2.697   | H 1.0927   | -7.39    | -0.1536 | N 6.5278  | 8.1043  | 1.8594  | N 3.4517  | -3.63    | 7.9072  |
| H -9.1764  | -4.3463  | -3.2459  | H 2.0927   | -6.3307  | -0.7373 | N 6.5954  | 8.0196  | 3.2045  | N -1.6888 | -2.74    | 5.9556  |
| H -8.8278  | -7.6688  | 7.7225   | H 2.4728   | -7.8514  | -0.739  | N 0.7316  | -7.5395 | 2.5996  | N -4.9095 | -6.6005  | 7.2609  |
| H -9.1565  | -6.196   | 7.3058   | H 9.637    | 1.4718   | 1.8553  | N 3.9522  | -6.6789 | 1.2942  | N -5.1601 | -3.6917  | 5.9382  |
| H -7.7265  | -6.5586  | 7.8334   | H 6.7318   | 2.1631   | 4.9199  | N -1.4334 | -7.5318 | 2.4323  | N 7.1365  | 6.2669   | 5.7039  |
| H -8.008   | 10.9872  | 1.4514   | H 5.5474   | 3.1832   | 5.0603  | N -4.409  | -6.6494 | 0.648   | N 7.384   | 6.5332   | -2.0486 |
| H -8.4769  | 10.4602  | 4.0082   | H 7.0069   | 3.6221   | 5.4262  | N -4.8594 | -6.5559 | 1.9165  | N 7.6347  | 6.6243   | -0.726  |
| H -8.8634  | 8.9555   | 4.2016   | H 7.9691   | 2.4847   | -0.2112 | N 5.0592  | -8.1589 | -1.2911 | N 0.1295  | 2.9065   | -3.0036 |
| H -7.4169  | 9.443    | 4.555    | H 8.3555   | 3.9893   | -0.4046 | N 7.1216  | -7.0307 | 0.7303  | N -4.321  | 1.1958   | 5.2959  |
| H -5.4463  | -0.5448  | -3.303   | H 6.909    | 3.502    | -0.7581 | N 7.9417  | -6.4209 | -5.2909 | N -0.4973 | -3.8199  | 2.2323  |
| H -1.9516  | 0.8889   | -2.0842  | H 4.4438   | -10.7858 | 0.5796  | N 4.9008  | -6.4151 | -6.4041 | N 8.4594  | -0.3753  | -1.4763 |
| H -5.4757  | 1.0763   | -6.2639  | H 5.5997   | -9.7739  | 0.9008  | N 6.9431  | -3.7293 | 7.7519  | N -0.4776 | -3.1358  | -3.3517 |
| H -4.3557  | 0.2302   | -5.562   | H 4.1044   | -9.3248  | 1.0383  | N 6.4993  | -3.2999 | 8.9517  | N -0.9021 | -7.1932  | 6.552   |
| H -3.9657  | 1.3795   | -6.5556  | H 4.0786   | -10.9872 | -2.0824 | N 6.2707  | -3.4207 | 4.6612  | N 3.2062  | 1.1704   | 5.8783  |
| H -4.9695  | 3.7006   | -0.91    | H 0.4088   | -2.898   | 8.8988  | N 3.9021  | -3.7236 | 6.6387  | N -8.3951 | -0.439   | -2.7535 |
| H -3.4729  | 4.0529   | -1.2113  | H 1.2999   | -3.9641  | 9.6287  | N 7.5922  | -0.6518 | 2.8167  | N 0.5958  | 6.9505   | -6.8774 |
| H -3.8721  | 2.5827   | -0.8509  | H 1.6857   | -2.446   | 9.6895  | N 7.6334  | 1.4752  | 2.3809  | N -0.5311 | 9.1752   | 3.1281  |
| H -1.998   | -1.5125  | -1.5921  | H 2.1654   | -3.0985  | 3.9152  | N 6.4296  | 4.7933  | 2.9783  | O 0.1593  | 1.8546   | -3.6724 |
| H -4.063   | -3.6463  | -5.5259  | H 3.6813   | -2.729   | 4.0425  | N 6.7037  | 4.8768  | 1.6596  | O 0.015   | 2.8555   | -1.7631 |
| H -5.5584  | -3.197   | -5.3884  | H 3.246    | -4.2326  | 3.9762  | N 5.3497  | 6.8515  | -4.3665 | O 0.1602  | 4.0103   | -3.5798 |
| H -4.4024  | -2.1852  | -5.0672  | H -1.7419  | -0.9563  | 4.9039  | N 5.2687  | 6.2474  | -5.5705 | O -4.3892 | 0.922    | 4.0813  |
| H 3.4123   | 7.5368   | 2.3589   | H -3.43    | -2.428   | 9.2941  | N 1.4747  | -5.4392 | -6.9199 | O -5.3647 | 1.3505   | 5.96    |
| H 2.3691   | 8.5701   | 1.81     | H -2.0499  | -2.8894  | 8.7088  | N -0.6901 | -5.4315 | -7.0872 | O -3.2095 | 1.2854   | 5.8536  |
| H 8.8979   | 8.9053   | 1.7704   | H -3.05    | -3.9488  | 9.2925  | N -7.4886 | -6.2535 | 5.0715  | O -0.3681 | -2.5983  | 2.3442  |
| H -4.5386  | -9.2944  | 0.3703   | H -11.1782 | -3.4852  | 4.9385  | N 7.6848  | 3.669   | -6.0704 | O -0.9869 | -4.3376  | 1.1767  |
| H -4.8137  | -10.7533 | -0.136   | H -10.2226 | -4.7251  | 4.8257  | N 6.6861  | 6.3605  | 6.9724  | O -0.1316 | -4.6021  | 3.1806  |
| H -5.9981  | -9.7332  | 0.0045   | H -9.7863  | -3.3427  | 4.2293  | N 8.1352  | 3.5754  | -7.3389 | O 9.4332  | 0.4032   | -1.4767 |
| H -4.0452  | -10.9587 | -2.7103  | H -11.0339 | -2.403   | 7.4015  | N -7.4564 | -6.9795 | -0.3965 | O 7.5654  | -0.2545  | -0.616  |
| H -4.6365  | -9.4145  | -5.814   | H -10.1751 | -1.6547  | 9.7969  | N -8.336  | -3.6756 | 6.571   | O 8.3604  | -1.2498  | -2.3596 |
| H -3.5765  | -10.4317 | -5.2671  | H -8.6463  | -1.3196  | 9.7573  | N -7.0801 | -5.9403 | -5.2179 | O -1.0267 | -10.0304 | -2.6792 |
| H -3.19    | -8.927   | -5.4605  | H -9.1318  | -2.6881  | 10.3458 | N -8.0788 | -3.2487 | 7.8249  | O -0.4386 | -9.2271  | -4.5945 |
| H -4.411   | 10.0558  | -4.3994  | N -6.9374  | 8.1516   | 0.8187  | N -7.9003 | -6.5501 | 0.8033  | O 0.1336  | -8.214   | -2.7773 |
| H -5.6314  | 9.2178   | -3.8783  | N -7.8918  | 6.4117   | 5.8456  | N -7.3374 | -6.3672 | -6.4718 | O -0.3656 | -8.299   | 6.7609  |
| H -4.1865  | 8.9041   | -3.3583  | N -7.0355  | 4.8406   | 1.9375  | N -7.2115 | 8.0681  | 2.1374  | O -0.563  | -6.5154  | 5.5625  |
| H -3.6552  | 9.2039   | -6.8413  | N -4.9733  | 5.9687   | 3.959   | N -7.6444 | 6.678   | -1.9069 | O -1.8527 | -6.8179  | 7.2663  |
| H 3.3083   | 1.665    | -10.655  | N -1.1332  | 7.9802   | -0.7458 | N -4.5969 | 7.008   | -0.8624 | O 0.0229  | 1.2673   | 6.2584  |
| H 4.8104   | 1.3192   | -10.3811 | N -4.153   | 6.5786   | -2.0622 | N -7.1032 | 4.9253  | 0.5925  | O 3.4587  | 0.898    | 4.6879  |
| H 4.4306   | 2.6908   | -11.0365 | N 1.0318   | 7.9726   | -0.5785 | N -3.8558 | 0.6247  | -2.8552 | O 4.1364  | 1.3175   | 6.6953  |
| H -0.4679  | 6.6632   | 4.6761   | N 4.2082   | 6.5492   | -1.4159 | N -4.8589 | 3.4019  | -4.8794 | O -9.3813 | -1.184   | -2.5898 |
| H -1.6668  | 2.9221   | 4.1093   | N 4.4654   | 6.9762   | -0.162  | N -4.7779 | 4.0059  | -3.6754 | O -7.6403 | -0.1846  | -1.7946 |
| H -3.2657  | 6.0628   | 7.5545   | N -4.8255  | 6.8872   | -5.1529 | N -3.8969 | -1.5022 | -2.4194 | O -8.1418 | 0.0197   | -3.8849 |
| H -1.8739  | 6.2053   | 6.8454   | N -7.194   | 6.5843   | -3.1794 | N -5.0179 | -4.8121 | -3.1965 | O 1.5001  | 7.8003   | -6.9955 |
| H -2.8295  | 7.4451   | 6.9581   | N -5.116   | -8.1231  | -2.0776 | N -4.9501 | -4.8968 | -1.8514 | O -0.1128 | 6.6576   | -7.8604 |
| H -2.877   | 4.3747   | 1.987    | N -4.8418  | -8.0396  | -3.3993 | N -3.7173 | 3.7041  | -7.8299 | O 0.3048  | 6.5078   | -5.7494 |
| H -4.4057  | 4.0396   | 2.0266   | N -8.1564  | 1.5307   | 1.1605  | N -6.8933 | 3.7202  | -7.1972 | O 0.1189  | 10.2164  | 2.9096  |
| H -3.9202  | 5.4081   | 1.4381   | N -8.1975  | -0.5963  | 1.5963  | N -4.5647 | 6.282   | -6.3304 | O -0.2814 | 8.1393   | 2.2482  |
| H 0.7776   | 2.9135   | 4.2981   | N -7.1945  | -3.3734  | 3.6204  | N -7.144  | 3.6291  | -8.5199 | O -1.497  | 9.1986   | 3.9164  |

 Coordinates of Optimized Structures of NH<sub>3</sub>@JCM-1 [H° = -556.686229]
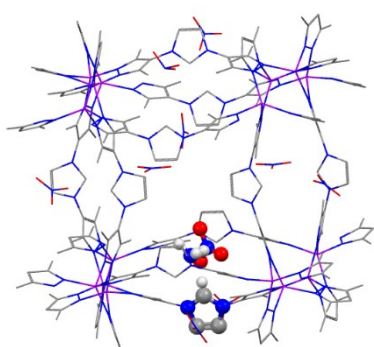

Charge = 0; Multiplicity = 1;

|           |         |          |            |        |         |           |        |         |           |        |         |
|-----------|---------|----------|------------|--------|---------|-----------|--------|---------|-----------|--------|---------|
| C -6.9832 | 9.8599  | -1.0375  | C -8.1417  | 3.3629 | -5.0201 | C -2.8282 | 6.8411 | -2.1694 | C -7.2041 | 9.407  | 0.3846  |
| C -4.6789 | -3.5588 | -3.5836  | C -10.0755 | 5.8418 | 2.9737  | C -2.4555 | 7.5075 | -1.0203 | C -3.5758 | 6.9    | -8.5811 |
| C -4.3342 | -2.8643 | -2.4425  | C -9.4449  | 5.9973 | 4.3354  | C -3.5635 | 7.6045 | -0.2144 | C -7.4617 | 0.5154 | 1.6816  |
| C -4.508  | -3.7064 | -1.3714  | C -10.0014 | 5.8262 | 5.5862  | C -3.6695 | 8.2309 | 1.1551  | C -9.3746 | 1.0481 | 0.7332  |
| C -4.2824 | -3.4133 | 0.0924   | C -9.0264  | 6.0877 | 6.5176  | C 0.6165  | 9.2796 | -0.4467 | C -7.3779 | 3.1337 | 3.7636  |
| C -9.0769 | 3.1502  | -10.0691 | C -9.1404  | 6.0545 | 8.0227  | C 2.2826  | 6.4519 | -3.0434 | C -7.3745 | 3.5874 | 2.3247  |
| C -8.4462 | 3.3058  | -8.7074  | C -0.0458  | 7.2041 | -0.7609 | C 2.9174  | 6.8209 | -1.7253 | C -7.7192 | 2.8928 | 1.1836  |
| C -9.0027 | 3.1346  | -7.4566  | C -0.7325  | 9.2843 | -0.5508 | C 2.3771  | 7.4905 | -0.6469 | C -7.5454 | 3.7348 | 0.1124  |
| C -8.0277 | 3.3962  | -6.5252  | C -2.001   | 6.4669 | -3.3744 | C 3.3488  | 7.5802 | 0.3198  | C -7.7709 | 3.4417 | -1.3514 |



|            |          |          |            |          |         |           |         |         |           |         |         |
|------------|----------|----------|------------|----------|---------|-----------|---------|---------|-----------|---------|---------|
| H 10.1795  | 5.5351   | 4.7123   | H -3.9202  | 5.4081   | 1.4381  | N -5.1601 | -3.6917 | 5.9382  | N 0.7388  | 6.6367  | -6.9091 |
| H 9.2885   | 6.601    | 3.9824   | H 0.7776   | 2.9135   | 4.2981  | N 7.1365  | 6.2669  | 5.7039  | N 1.4747  | -5.4392 | -6.9199 |
| H 8.9026   | 5.0829   | 3.9215   | H 1.85     | 6.0448   | 7.9499  | N 7.384   | 6.5332  | -2.0486 | N -0.5225 | 9.1736  | 3.1211  |
| H 9.6445   | 5.506    | 7.3527   | H 0.5847   | 6.1966   | 7.0355  | N 7.6347  | 6.6243  | -0.726  | N 0.0869  | -4.5322 | -0.7039 |
| H 7.3423   | 6.8695   | 9.6349   | H 1.5203   | 7.4298   | 7.2943  | N -6.9374 | 8.1516  | 0.8187  | N -0.6901 | -5.4315 | -7.0872 |
| H 8.4228   | 5.7355   | 9.6958   | H 7.2241   | -7.7252  | 8.9632  | N -7.8918 | 6.4117  | 5.8456  | N -7.4886 | -6.2535 | 5.0715  |
| H 6.9069   | 5.3659   | 9.5686   | H 7.6233   | -6.255   | 8.6028  | N -7.0355 | 4.8406  | 1.9375  | N 7.6848  | 3.669   | -6.0704 |
| H -10.9608 | -6.7197  | 1.9795   | H 6.1267   | -6.6073  | 8.9041  | N -4.9733 | 5.9687  | 3.959   | N 6.6861  | 6.3605  | 6.9724  |
| H -10.0253 | -5.4865  | 2.2384   | H 7.1431   | 10.7313  | -0.0113 | N -1.1332 | 7.9802  | -0.7458 | N 8.1352  | 3.5754  | -7.3389 |
| H -9.6955  | -6.8716  | 2.894    | H 7.4825   | 9.2702   | -0.47   | N -4.153  | 6.5786  | -2.0622 | N -7.4564 | -6.9795 | -0.3965 |
| H -10.4473 | -7.8042  | -0.4328  | H 5.9872   | 9.7194   | -0.3325 | N 1.0318  | 7.9726  | -0.5785 | N -8.336  | -3.6756 | 6.571   |
| H -9.2359  | -8.5598  | -2.6681  | H 7.5083   | 10.9327  | 2.6507  | N 4.2082  | 6.5492  | -1.4159 | N -7.0801 | -5.9403 | -5.2179 |
| H -7.7338  | -8.9056  | -2.3943  | H 6.4364   | 9.3943   | 5.6257  | N 4.4654  | 6.9762  | -0.162  | N -8.0788 | -3.2487 | 7.8249  |
| H -8.1136  | -7.5342  | -3.0495  | H 7.5749   | 10.4038  | 5.2489  | N -4.8255 | 6.8872  | -5.1529 | N -7.9003 | -5.5501 | 0.8033  |
| H -9.2239  | -7.4167  | -8.2171  | H 7.9165   | 8.8966   | 5.4985  | N -7.194  | 6.5843  | -3.1754 | N -7.3374 | -6.3672 | -6.4718 |
| H -8.7876  | -6.0342  | -8.8135  | H -0.2788  | -6.0643  | 1.6502  | N -5.116  | -8.1231 | -2.0776 | N -7.2115 | -8.0681 | -2.1374 |
| H -10.1795 | -6.1768  | -8.1043  | H 0.7846   | -9.3231  | 3.6513  | N -4.8418 | -8.0396 | -3.3963 | N -7.6444 | 6.678   | -1.9069 |
| H -10.0352 | -5.0947  | -5.6412  | H 1.0927   | -7.39    | -0.1536 | N -8.1564 | 1.5307  | 1.1605  | N -4.5969 | 7.008   | -0.8624 |
| H -7.6477  | -4.0111  | -3.2855  | H 2.0927   | -6.3307  | -0.7373 | N -8.1975 | -0.5963 | 1.5963  | N -7.1032 | 4.9253  | 0.5925  |
| H -8.1332  | -5.3796  | -2.697   | H 2.4728   | -7.8514  | -0.7339 | N -7.1945 | -3.3734 | 3.6204  | N -3.8558 | 0.6247  | -2.8552 |
| H -9.1764  | -4.3463  | -3.2459  | H 9.637    | 1.4718   | 1.8553  | N -7.2755 | -3.9774 | 2.4164  | N -4.8589 | 3.4019  | -4.8794 |
| H -8.8278  | -7.6688  | 7.7225   | H 6.7318   | 2.1631   | 4.9199  | N -0.541  | 2.2808  | -8.6673 | N -4.7779 | 4.0059  | -3.6754 |
| H -9.1565  | -6.196   | 7.3058   | H 5.5474   | 3.1832   | 5.0603  | N 1.624   | 2.2731  | -8.5    | N -3.8969 | -1.5022 | -2.4194 |
| H -7.7265  | -6.5586  | 7.8334   | H 7.0069   | 3.6221   | 5.4262  | N 4.6439  | 3.6747  | -7.1836 | N -5.0179 | -4.8121 | -3.1965 |
| H -8.008   | 10.9872  | 1.4514   | H 7.9691   | 2.4847   | -0.2112 | N 5.0878  | 3.2454  | -8.3834 | N -4.9501 | -4.8968 | -1.8514 |
| H -8.4769  | 10.4602  | 4.0082   | H 8.3555   | 3.9893   | -0.4046 | N -1.5396 | 4.9723  | 4.3755  | N -3.7173 | 3.7041  | -7.8299 |
| H -8.8634  | 8.9555   | 4.2016   | H 6.909    | 3.502    | -0.7581 | N -4.716  | 6.3956  | 5.2129  | N -6.8933 | 3.7202  | -7.1972 |
| H -7.4169  | 9.443    | 4.555    | H 4.4438   | -10.7858 | 0.5796  | N 0.6253  | 4.9647  | 4.5428  | N -4.5647 | 6.282   | -6.3304 |
| H -5.4463  | -0.5448  | -3.303   | H 5.5997   | -9.7739  | 0.9008  | N 3.6452  | 6.3663  | 5.8592  | N -7.144  | 3.6291  | -8.5199 |
| H -1.9516  | 0.8889   | -2.0842  | H 4.1044   | -9.3248  | 1.0383  | N 4.0891  | 5.9369  | 4.6594  | N -3.9746 | 3.2772  | -9.0838 |
| H -5.4757  | 1.0763   | -6.2639  | H 4.0786   | -10.9872 | -2.0824 | N 3.9535  | -1.5298 | -1.8126 | N -8.1426 | 6.3206  | 4.5229  |
| H -4.3557  | 0.2302   | -5.562   | H 0.4088   | -2.898   | 8.8988  | N -7.2279 | -6.8588 | 3.894   | N 5.1574  | -4.8479 | -2.41   |
| H -3.9657  | 1.3795   | -6.5556  | H 1.2999   | -3.9641  | 9.6287  | N 7.3788  | -6.6038 | 1.9842  | N 4.8832  | -4.9313 | -1.0913 |
| H -4.9695  | 3.7006   | -0.91    | H 1.6857   | -2.446   | 9.6895  | N 4.2029  | -6.5877 | 2.617   | N 3.9947  | 0.5972  | -2.2484 |
| H -3.4729  | 4.0529   | -1.2113  | H 2.1654   | -3.0985  | 3.9152  | N 6.5314  | -4.0259 | 3.4837  | O 0.1585  | 1.9152  | -3.6544 |
| H -3.8721  | 2.5827   | -0.8509  | H 3.6813   | -2.729   | 4.0425  | N 6.5278  | 8.1043  | 1.8594  | O 0.019   | 2.887   | -1.8112 |
| H -1.998   | -1.5125  | -1.5921  | H 3.246    | -4.2326  | 3.9762  | N 6.5954  | 8.0196  | 3.2045  | O 0.1596  | 3.9995  | -3.57   |
| H -4.063   | -3.6463  | -5.5259  | H -1.7419  | -0.9563  | 4.9039  | N 0.7316  | -7.5395 | 2.5996  | O -4.3946 | 0.9259  | 4.094   |
| H -5.5584  | -3.197   | -5.3884  | H -3.43    | -2.428   | 9.2941  | N 3.9522  | -6.6789 | 1.2942  | O -5.3272 | 1.3405  | 5.9152  |
| H -4.4024  | -2.1852  | -5.0672  | H -2.0499  | -2.8894  | 8.7088  | N -1.4334 | -7.5318 | 2.4323  | O -3.2446 | 1.2753  | 5.801   |
| H 3.4123   | 7.5368   | 2.3589   | H -3.05    | -3.9488  | 9.2925  | N -4.409  | -6.6494 | 0.648   | O -0.1269 | -2.7563 | 2.4015  |
| H 2.3691   | 8.5701   | 1.81     | H -11.1782 | -3.4852  | 4.9385  | N -4.8594 | -6.5559 | 1.9165  | O -1.4672 | -4.3735 | 1.7949  |
| H 3.8979   | 8.9053   | 1.7704   | H -10.2226 | -4.7251  | 4.8257  | N 5.0592  | -8.1589 | -1.2911 | O -0.0024 | -4.7071 | 3.3837  |
| H -4.5386  | -9.2944  | 0.3703   | H -9.7863  | -3.3427  | 4.2293  | N 7.1216  | -7.0307 | 0.7303  | O 9.3756  | 0.3775  | -1.4784 |
| H -4.8137  | -10.7533 | -0.136   | H -11.0339 | -2.403   | 7.4015  | N 7.9417  | -6.4209 | -5.2909 | O 7.5785  | -0.2539 | -0.6251 |
| H -5.9981  | -9.7332  | 0.0045   | H -10.1751 | -1.6547  | 9.7969  | N 4.9008  | -6.4151 | -6.4041 | O 8.3566  | -1.2574 | -2.2816 |
| H -4.0452  | -10.9587 | -2.7103  | H -8.6463  | -1.3196  | 9.7573  | N 6.9431  | -3.7293 | 7.7519  | O -1.0156 | -9.9382 | -2.6684 |
| H -4.6365  | -9.4145  | -5.814   | H -9.1318  | -2.6881  | 10.3458 | N 6.4993  | -3.2999 | 8.9517  | O -0.4398 | -9.1767 | -4.524  |
| H -3.5765  | -10.4317 | -5.2671  | H -0.3407  | -4.4556  | -1.625  | N 6.2707  | -3.4207 | 4.6612  | O 0.1302  | -8.198  | -2.772  |
| H -3.19    | -8.927   | -5.4605  | H -0.6176  | -4.2248  | -0.0277 | N 3.9021  | -3.7236 | 6.6387  | O -0.855  | -8.4316 | 6.7111  |
| H -4.411   | 10.0558  | -4.3994  | H 0.8073   | -3.8129  | -0.6793 | N 7.5922  | -0.6518 | 2.8167  | O -0.5401 | -6.6228 | 5.7225  |
| H -5.6314  | 9.2178   | -3.8783  | N 5.3163   | 3.3661   | -4.0929 | N 7.6334  | 1.4752  | 2.3809  | O -1.9276 | -6.7339 | 7.2757  |
| H -4.1865  | 8.9041   | -3.3583  | N 5.0555   | 3.9714   | -2.9154 | N 6.4296  | 4.7933  | 2.9783  | O 2.065   | 1.2567  | 6.2112  |
| H -3.6552  | 9.2039   | -6.8413  | N 4.4504   | -6.3215  | -5.1356 | N 0.1291  | 2.9336  | -3.0105 | O 3.461   | 0.8996  | 4.7007  |
| H 3.3083   | 1.665    | -10.655  | N 7.4979   | -5.9914  | -4.0911 | N 6.7037  | 4.8768  | 1.6596  | O 4.1058  | 1.3074  | 6.644   |
| H 4.8104   | 1.3192   | -10.3811 | N 4.9916   | -8.0741  | -2.6362 | N -4.322  | 1.1897  | 5.2679  | O -9.3234 | -1.1598 | -2.5932 |
| H 4.4306   | 2.6908   | -11.0365 | N 6.2373   | -6.906   | 4.9348  | N -0.5276 | -3.9186 | 2.5338  | O -7.6523 | -0.1894 | -1.8047 |
| H -0.4679  | 6.6632   | 4.6761   | N 6.3183   | -6.302   | 6.1387  | N 8.4452  | -0.3881 | -1.4516 | O -8.1493 | 0.057   | -3.8168 |
| H -1.6668  | 2.9221   | 4.1093   | N -3.9108  | -6.2921  | -5.7818 | N 5.3497  | 6.8515  | -4.3665 | O 1.4076  | 7.6361  | -7.0007 |
| H -3.2657  | 6.0628   | 7.5545   | N -4.1615  | -6.3833  | -7.1046 | N -0.4688 | -9.0866 | -3.3226 | O -0.1901 | 6.7704  | -7.6666 |
| H -1.8739  | 6.2053   | 6.8454   | N 0.4762   | -2.7476  | 6.1229  | N -1.073  | -7.2514 | 6.6015  | O 0.2786  | 6.6293  | -5.7946 |
| H -2.8295  | 7.4451   | 6.9581   | N 3.4517   | -3.63    | 7.9072  | N 5.2687  | 6.2474  | -5.5705 | O 0.1103  | 10.1773 | 2.9102  |
| H -2.877   | 4.3747   | 1.987    | N -1.6888  | -2.74    | 5.9556  | N 3.2108  | 1.1633  | 5.8499  | O -0.2837 | 8.1704  | 2.4977  |
| H -4.4057  | 4.0396   | 2.0266   | N -4.9095  | -3.6005  | 7.2609  | N -8.3844 | -0.4177 | -2.7343 | O -1.4549 | 9.1996  | 3.8844  |

Coordinates of Optimized Structures of **JCM-1(Cl)** [ $H^\circ = -680.321789$ ]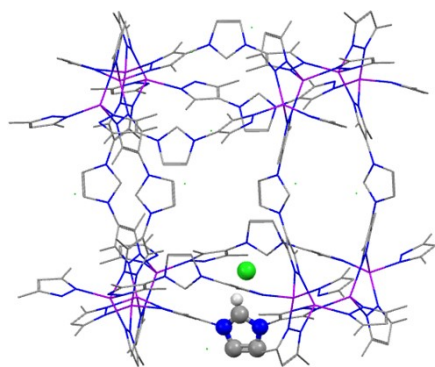

Charge = 0; Multiplicity = 1;

|           |         |          |            |          |          |            |         |         |            |         |          |
|-----------|---------|----------|------------|----------|----------|------------|---------|---------|------------|---------|----------|
| C -1.7404 | -3.9754 | -8.7289  | C 0.1631   | -0.523   | -3.2574  | C -6.0916  | 3.5992  | 0.2972  | C -11.7762 | -5.5061 | -0.4226  |
| C 1.2073  | -4.4233 | -12.8488 | C 1.2857   | -1.7166  | -7.0769  | C -4.634   | 3.9507  | 3.5165  | C -8.8285  | -5.9539 | -4.5425  |
| C 7.4407  | -8.2725 | 0.316    | C -0.8806  | 8.0713   | 10.0651  | C -4.9684  | 3.4109  | -0.6318 | C -0.605   | -4.0787 | -11.0191 |
| C 6.7363  | -7.9405 | 1.446    | C -6.2802  | -10.0771 | -3.4462  | C -4.3134  | 2.0135  | 2.5449  | C 0.6674   | -4.3552 | -11.453  |
| C 8.0102  | -7.1357 | -0.1784  | C -5.1243  | -9.4614  | -3.8561  | C -7.9161  | 3.8587  | 3.4881  | C -0.6171  | -4.1638 | -9.6579  |
| C 8.8732  | -6.9699 | -1.3563  | C -7.0595  | -9.146   | -2.8244  | C 5.0006   | 0.7364  | 1.8177  | Cl -0.7784 | -5.0081 | 1.2064   |
| C 5.956   | -8.8169 | 2.3774   | C -8.3779  | -9.3129  | -2.1968  | C -3.0899  | 3.8556  | 5.363   | Cl 6.9951  | 0.9475  | 5.0543   |
| C 4.9257  | 10.1193 | 0.6665   | C -3.932   | -10.0369 | -4.5573  | C -3.8012  | 4.1957  | 6.4863  | Cl -2.4512 | -8.6457 | 2.902    |
| C 4.342   | 9.5684  | 1.7797   | C 2.0366   | 9.9183   | 6.3314   | C -1.7689  | 4.0891  | 5.6103  | Cl 4.8989  | -7.5511 | -3.1789  |
| C 5.7768  | 9.1963  | 0.1329   | C -8.7952  | 8.3147   | -3.0957  | C -0.614   | 3.9043  | 4.7202  | Cl 0.8317  | 0.1268  | 3.6408   |
| C 6.6467  | 9.3124  | -1.046   | C -7.5185  | 8.0475   | -3.5224  | C -3.4471  | 2.1116  | 3.6097  | Cl 1.4439  | 3.8888  | -1.4227  |
| C 3.3599  | 10.1678 | 2.7392   | C -9.2929  | 7.186    | -2.513   | C -5.279   | 4.1575  | 6.7293  | Cl -3.4495 | -0.2361 | -7.7835  |
| C 3.486   | -1.9871 | 7.053    | C -10.6045 | 6.9694   | -1.8865  | C 3.9321   | 5.0447  | -6.6477 | Cl -4.706  | 7.7436  | 3.2254   |
| C 2.33    | -2.6028 | 7.4628   | C -6.5281  | 8.9478   | -4.1955  | C 3.3459   | -2.9995 | 2.7746  | Cl 2.6522  | 8.8638  | -2.8645  |
| C 4.2653  | -2.9182 | 6.4311   | C -0.1056  | 4.1408   | 11.8127  | C 2.6597   | 5.3213  | -6.214  | Cl -3.2777 | -0.3388 | -1.4101  |
| C 2.9919  | 0.365   | 6.8911   | C 0.4826   | 4.7011   | 10.7065  | C 3.9442   | 5.1299  | -8.0091 | Co 1.2409  | -5.3401 | 7.7074   |
| C 5.5837  | -2.7512 | 5.8036   | C -1.442   | 4.0203   | 11.5675  | C 5.4019   | 5.4814  | -4.7898 | Co 1.4171  | -5.0251 | -7.557   |
| C 4.8174  | -0.1013 | 8.0089   | C -2.5004  | 3.4991   | 12.4441  | C 5.0675   | 4.9415  | -8.9381 | Co -2.6736 | 6.1595  | -5.26    |
| C 1.1378  | -2.0273 | 8.1642   | C 1.9151   | 5.07     | 10.4698  | C 5.7224   | 3.5441  | -5.7613 | Co -0.0456 | 5.6712  | -7.3531  |
| C 2.8374  | 2.7557  | 7.1435   | C 9.9303   | 5.6715   | 3.5064   | C 2.1198   | 5.3894  | -4.8182 | Co -8.1259 | 4.4605  | -1.8037  |
| C 1.5607  | 3.0228  | 7.57     | C 10.5185  | 6.2318   | 2.4002   | C 6.946    | 5.3863  | -2.9433 | Co -5.736  | 5.7141  | -3.8636  |
| C 3.3351  | 3.8843  | 6.5608   | C 8.5938   | 5.5509   | 3.2612   | C 3.3616   | -0.1606 | 0.6739  | Co -0.2218 | 5.3562  | 7.9113   |
| C 4.6467  | 4.1009  | 5.9342   | C 7.5355   | 5.0298   | 4.1379   | C 6.2346   | 5.7264  | -1.82   | Co 2.1681  | 6.6098  | 5.8514   |
| C 4.631   | 1.262   | 8.0349   | C 11.951   | 6.6007   | 2.1635   | C 8.267    | 5.6198  | -2.6959 | Co 5.8245  | -5.5084 | 2.8575   |
| C 0.5703  | 2.1226  | 8.2432   | C -11.793  | 2.8164   | -2.5524  | C 9.4218   | 5.435   | -3.5861 | Co 8.2143  | -4.2548 | 0.7975   |
| C 7.8466  | -6.4549 | 6.3197   | C -10.6438 | 3.4403   | -2.969   | C 6.5888   | 3.6423  | -4.6965 | Co 4.1236  | 6.9298  | 3.0945   |
| C 6.5742  | -6.1783 | 6.7536   | C -11.8206 | 2.8441   | -1.1889  | C 4.7569   | 5.6882  | -1.5769 | Co 6.7516  | 6.4415  | 1.0014   |
| C 7.8587  | -6.3697 | 4.9584   | C -12.8473 | 2.3266   | -0.2733  | C 5.8352   | 8.254   | 6.6     | Co -4.0352 | -6.7241 | -4.1007  |
| C 8.982   | -6.5581 | 4.0295   | C -10.1491 | 3.7029   | -4.3584  | C 4.686    | 7.6301  | 7.0166  | Co -0.9727 | -6.2787 | -5.497   |
| C 6.0343  | -6.1103 | 8.1492   | C -1.7571  | 4.347    | -10.8587 | C 8.8628   | 8.2262  | 5.2365  | Co 3.8689  | -5.8284 | 5.6143   |
| C -3.8408 | -7.7793 | -8.0454  | C -0.6079  | 4.9709   | -11.2753 | C 7.4223   | -1.0212 | 0.4656  | Co -6.6632 | -6.2358 | -2.0075  |
| C -4.5522 | -7.4392 | -6.922   | C -1.7847  | 4.3748   | -9.495   | C 6.8895   | 8.7437  | 4.3211  | H -1.4684  | -3.7617 | -11.6764 |
| C -2.5198 | -7.5458 | -7.798   | C -2.8115  | 3.8573   | -8.5796  | C 4.1913   | 7.3675  | 8.4062  | H 4.1756   | -9.6693 | 5.3787   |
| C -1.3649 | -7.7306 | -6.6881  | C -0.1132  | 5.2335   | -12.6647 | C -5.8522  | 6.9296  | -7.765  | H 0.5205   | -7.7491 | 9.5902   |
| C -6.0299 | -7.4774 | -6.679   | C -2.8679  | 7.2147   | -1.3153  | C -6.4404  | 6.3692  | -6.6589 | H 1.4314   | 10.3981 | 5.7611   |
| C -1.9377 | -4.5701 | 5.2025   | C -2.1566  | 6.8746   | -2.4386  | C -4.5158  | 7.0501  | -7.5198 | H -1.5526  | 7.4113  | 8.9792   |
| C -2.5259 | -5.1304 | 6.3086   | C -4.1889  | 6.9813   | -1.5627  | C -3.4574  | 7.5712  | -8.3965 | H 5.7905   | 0.8352  | 2.2985   |
| C -0.6013 | -4.4495 | 5.4477   | C -1.3238  | 7.1196   | 0.5312   | C -7.8729  | 6.0003  | -6.422  | H 7.8253   | -0.7894 | 0.2472   |
| C -3.409  | -5.0069 | 3.3458   | C -5.3438  | 7.1661   | -0.6726  | C 4.5066   | 3.0885  | 1.6558  | H 8.2092   | -0.4289 | 1.1147   |
| C 0.4571  | -3.9284 | 4.5709   | C -2.5107  | 8.9587   | 0.438    | C 5.6625   | 3.7042  | 1.246   | H 3.4469   | -3.572  | 3.5388   |
| C -2.7588 | -2.9216 | 3.5138   | C -0.6788  | 6.9128   | -2.6817  | C 3.0668   | -9.0178 | 8.0423  | H 4.4876   | 1.68    | 0.2943   |
| C -3.9584 | -5.4993 | 6.5453   | C 0.146    | 7.5563   | 2.3891   | C 3.7273   | 4.0196  | 2.2777  | H 7.3897   | 2.6382  | 1.1732   |
| C -4.9516 | -4.9116 | 1.498    | C 1.4183   | 7.2797   | 1.9553   | C 2.4088   | 3.8527  | 2.9052  | H 3.3564   | 4.4022  | 3.6908   |
| C -6.1008 | -5.5355 | 1.9146   | C 0.1338   | 7.4711   | 3.7505   | C 3.1751   | 1.2027  | 0.6998  | H 0.7344   | -6.1529 | 0.0804   |
| C -4.924  | -4.9394 | 0.1345   | C -0.9894  | 7.6595   | 4.6794   | C 6.8548   | 3.1287  | 0.5447  | H 1.1156   | -9.7354 | 1.7115   |
| C -3.8973 | -4.4218 | -0.781   | C -1.6444  | 9.0569   | 1.5027   | C 6.3506   | -8.467  | 6.9291  | H 3.3154   | -5.5298 | -0.0761  |
| C -3.6251 | -3.0198 | 2.449    | C 1.9583   | 7.2117   | 0.5596   | C 2.1574   | -7.1526 | 2.1089  | H 1.0142   | -7.0489 | 5.1373   |
| C -6.5955 | -5.7981 | 3.304    | C -6.5096  | 1.6965   | -4.3451  | C 3.3066   | -6.5287 | 1.6922  | H -0.4536  | -0.9132 | -0.2173  |
| C 8.0982  | -3.0394 | -3.1038  | C -7.2141  | 2.0284   | -3.2151  | C 2.1298   | -7.1248 | 3.4723  | H 1.3664   | -5.7507 | -2.4718  |
| C 7.5099  | -3.5997 | -1.9977  | C -5.9402  | 2.8332   | -4.8395  | C 0.6148   | -7.0573 | 0.2611  | H -4.0531  | -7.6232 | -1.091   |
| C 9.4346  | -2.9188 | -2.8586  | C -6.0171  | -0.6559  | -4.1818  | C 1.103    | -7.6423 | 4.3878  | H 3.6513   | -5.3338 | 10.7228  |
| C 6.6268  | -3.4762 | -4.9605  | C -5.0771  | 2.999    | -6.0175  | C 0.8309   | -9.0444 | 1.1577  | H -2.0647  | -5.0374 | 12.1448  |
| C 10.4929 | -2.3977 | -3.7353  | C -6.8718  | -0.0415  | -6.1033  | C 3.8013   | -6.2661 | 0.3027  | H 13.6872  | -3.8031 | 2.4165   |
| C 7.277   | -1.3909 | -4.7925  | C -7.9944  | 1.152    | -2.2838  | C 2.2157   | -8.0949 | 8.5759  | H 7.9711   | -3.5067 | 3.8386   |
| C 6.0774  | -3.9686 | -1.761   | C 5.1551   | -1.6543  | 1.5654   | C -0.8565  | -7.4941 | -1.5955 | H -9.1009  | -6.7789 | -4.9511  |
| C 0.5518  | 9.3739  | 8.3928   | C -5.861   | -3.0463  | -4.4355  | C -0.2683  | -6.9338 | -2.7018 | H -11.6987 | -6.1292 | 0.3037   |
| C 5.0843  | -3.3809 | -6.8083  | C -6.4448  | -3.5972  | -3.3224  | C -2.193   | -7.6147 | -1.8409 | H 0.9349   | -5.2482 | -13.2574 |
| C 3.935   | -4.0048 | -6.3917  | C -5.01    | -3.9693  | -4.9692  | C -3.2513  | -8.1358 | -0.9642 | H -1.6628  | -4.9885 | -8.0026  |
| C 5.1118  | -3.4087 | -8.1718  | C -4.1401  | -3.8532  | -6.1481  | C -0.0354  | -9.1426 | 0.093   | H 6.5611   | -9.2967 | 2.9477   |
| C 6.1386  | -2.8912 | -9.0873  | C -6.6854  | -1.4048  | -6.1292  | C 1.1642   | -6.5649 | 2.9385  | H 9.5452   | -6.3099 | -1.1703  |
| C 6.4107  | -1.4891 | -5.8573  | C -7.4269  | -2.9978  | -2.3628  | C 1.3459   | -8.211  | 9.7548  | H -12.59   | 1.4554  | 0.0373   |
| C 3.4403  | -4.2674 | -5.0022  | C 6.4318   | -1.9214  | 1.1388   | C 10.466   | -4.2849 | 11.6521 | H 8.317    | 10.7707 | 3.3301   |
| C 1.2563  | 9.0419  | 7.2628   | C 2.0865   | -8.8792  | -6.2649  | C 1.7579   | -4.625  | 10.5288 | H 7.4721   | 8.8505  | -0.8814  |
| C -0.8477 | 2.4818  | -4.9252  | C 0.8098   | -8.6121  | -5.8383  | C -0.2744  | -4.5183 | 11.4047 | H -2.6713  | 2.5795  | 12.2284  |
| C -0.2639 | 3.0326  | -6.0383  | C 2.5841   | -7.7506  | -6.8476  | C -1.4293  | -4.3336 | 12.2949 | H 2.202    | 0.2662  | 6.4103   |
| C -1.6988 | 3.4047  | -4.3915  | C 3.8958   | -7.534   | -7.4741  | C 3.2357   | -4.5868 | 10.2857 | H 5.505    | -0.5786 | 8.4146   |
| C -0.6917 | 0.0913  | -5.1787  | C -0.1806  | -9.5124  | -5.1652  | C 4.6327   | -9.0664 | 5.9696  | H 0.6028   | -1.5368 | 7.5356   |
| C -2.5686 | 3.2886  | -3.2126  | C -4.285   | 9.5125   | -5.9143  | C 11.0824  | -2.7542 | 3.3458  | H 5.6361   | -3.3008 | 5.018    |
| C -0.0233 | 0.8402  | -3.2313  | C -1.5845  | 8.8968   | -5.5046  | C 11.7938  | -3.0943 | 2.2225  | H 5.1673   | 1.8908  | 8.4616   |
| C 0.7182  | 2.4333  | -6.9977  | C 0.3508   | 8.5815   | -6.5363  | C 9.7614   | -2.9877 | 3.0985  | H 0.1834   | 1.5303  | 7.5941   |
| C -0.0176 | 8.2371  | 8.8872   | C 1.6692   | 8.7484   | -7.1639  | C 8.6066   | -2.8029 | 3.9886  | H 4.5457   | 4.6734  | 5.1701   |
| C -0.1991 | -2.261  | -5.0156  | C 4.6575   | -2.7829  | 2.148    | C 13.2715  | -3.0561 | 1.9794  | H 8.3067   | -5.2853 | 8.5579   |
| C 0.5053  | -2.593  | -6.1455  | C -2.7767  | 9.4723   | -4.8034  | C -10.6408 | -5.6093 | -2.7128 | H 6.9045   | -5.935  | 3.3031   |
| C -0.7685 | -3.3978 | -4.5211  | C -6.1038  | 3.5141   | 1.6586   | C -9.3684  | -5.8859 | -3.1467 | H -6.4455  | -6.7304 | -7.116   |
| C -1.6316 | -3.5636 | -3.3432  | C -7.3761  | 3.7906   | 2.0923   | C -10.6529 | -5.6945 | -1.3516 | H -0.7295  | -7.0268 | -8.538   |



Coordinates of Optimized Structures of NH<sub>3</sub>@JCM-1(Cl) [H° = -736.860321]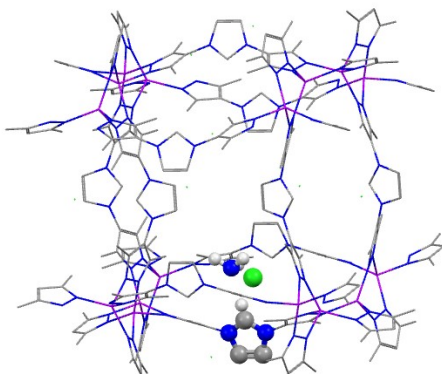

Charge = 0; Multiplicity = 1;

|           |         |          |            |          |          |            |         |         |            |         |          |
|-----------|---------|----------|------------|----------|----------|------------|---------|---------|------------|---------|----------|
| C -1.7404 | -3.9754 | -8.7289  | C 0.1631   | -0.523   | -3.2574  | C -6.0916  | 3.5992  | 0.2972  | C -11.7762 | -5.5061 | -0.4226  |
| C 1.2073  | -4.4233 | -12.8488 | C 1.2857   | -1.7166  | -7.0769  | C -4.634   | 3.9507  | 3.5165  | C -8.8285  | -5.9539 | -4.5425  |
| C 7.4407  | -8.2725 | 0.316    | C -0.8806  | 8.0713   | 10.0651  | C -4.9684  | 3.4109  | -0.6318 | C -0.605   | -4.0787 | -11.0191 |
| C 6.7363  | -7.9405 | 1.446    | C -6.2802  | -10.0771 | -3.4462  | C -4.3134  | 2.0135  | 2.5449  | C 0.6674   | -4.3552 | -11.453  |
| C 8.0102  | -7.1357 | -0.1784  | C -5.1243  | -9.4614  | -3.8561  | C -7.9161  | 3.8587  | 3.4881  | C -0.6171  | -4.1638 | -9.6579  |
| C 8.8732  | -6.9699 | -1.3563  | C -7.0595  | -9.146   | -2.8244  | C 5.0006   | 0.7364  | 1.8177  | Cl -0.9435 | -5.2168 | 1.3602   |
| C 5.956   | -8.8169 | 2.3774   | C -8.3779  | -9.3129  | -2.1968  | C -3.0899  | 3.8556  | 5.363   | Cl 6.9889  | 0.9465  | 5.0561   |
| C 4.9257  | 10.1193 | 0.6665   | C -3.932   | -10.0369 | -4.5573  | C -3.8012  | 4.1957  | 6.4863  | Cl -2.4495 | -8.6448 | 2.9005   |
| C 4.342   | 9.5684  | 1.7797   | C 2.0366   | 9.9183   | 6.3314   | C -1.7689  | 4.0891  | 5.6103  | Cl 4.8965  | -7.5481 | -3.1772  |
| C 5.7768  | 9.1963  | 0.1329   | C -8.7952  | 8.3147   | -3.0957  | C -0.614   | 3.9043  | 4.7202  | Cl 0.8411  | 0.1177  | 3.6277   |
| C 6.6467  | 9.3124  | -1.046   | C -7.5185  | 8.0475   | -3.5224  | C -3.4471  | 2.1116  | 3.6097  | Cl 1.4443  | 3.8884  | -1.4231  |
| C 3.3599  | 10.1678 | 2.7392   | C -9.2929  | 7.186    | -2.513   | C -5.279   | 4.1575  | 6.7293  | Cl -3.4525 | -0.2368 | -7.7776  |
| C 3.486   | -1.9871 | 7.053    | C -10.6045 | 6.9694   | -1.8865  | C 3.9321   | 5.0447  | -6.6477 | Cl -4.7027 | 7.7419  | 3.2229   |
| C 2.33    | -2.6028 | 7.4628   | C -6.5281  | 8.9478   | -4.1955  | C 3.3459   | -2.9995 | 2.7746  | Cl 2.6513  | 8.8635  | -2.8638  |
| C 4.2653  | -2.9182 | 6.4311   | C -0.1056  | 4.1408   | 11.8127  | C 2.6597   | 5.3213  | -6.214  | Cl -3.2615 | -0.3478 | -1.4157  |
| C 2.9919  | 0.365   | 6.8911   | C 0.4826   | 4.7011   | 10.7065  | C 3.9442   | 5.1299  | -8.0091 | Co 1.2409  | -5.3401 | 7.7074   |
| C 5.5837  | -2.7512 | 5.8036   | C -1.442   | 4.0203   | 11.5675  | C 5.4019   | 5.4814  | -4.7898 | Co 1.4171  | -5.0251 | -7.557   |
| C 4.8174  | -0.1013 | 8.0089   | C -2.5004  | 3.4991   | 12.4441  | C 5.0675   | 4.9415  | -8.9381 | Co -2.6736 | 6.1595  | -5.26    |
| C 1.1378  | -2.0273 | 8.1642   | C 1.9151   | 5.07     | 10.4698  | C 5.7224   | 3.5441  | -5.7613 | Co -0.0456 | 5.6712  | -7.3531  |
| C 2.8374  | 2.7557  | 7.1435   | C 9.9303   | 5.6715   | 3.5064   | C 2.1198   | 5.3894  | -4.8182 | Co -8.1259 | 4.4605  | -1.8037  |
| C 1.5607  | 3.0228  | 7.57     | C 10.5185  | 6.2318   | 2.4002   | C 6.946    | 5.3863  | -2.9433 | Co -5.736  | 5.7141  | -3.8636  |
| C 3.3351  | 3.8843  | 6.5608   | C 8.5938   | 5.5509   | 3.2612   | C 3.3616   | -0.1606 | 0.6739  | Co -0.2218 | 5.3562  | 7.9113   |
| C 4.6467  | 4.1009  | 5.9342   | C 7.5355   | 5.0298   | 4.1379   | C 6.2346   | 5.7264  | -1.82   | Co 2.1681  | 6.6098  | 5.8514   |
| C 4.631   | 1.262   | 8.0349   | C 11.951   | 6.6007   | 2.1635   | C 8.267    | 5.6198  | -2.6959 | Co 5.8245  | -5.5084 | 2.8575   |
| C 0.5703  | 2.1226  | 8.2432   | C -11.793  | 2.8164   | -2.5524  | C 9.4218   | 5.435   | -3.5861 | Co 8.2143  | -4.2548 | 0.7975   |
| C 7.8466  | -6.4549 | 6.3197   | C -10.6438 | 3.4403   | -2.969   | C 6.5888   | 3.6423  | -4.6965 | Co 4.1236  | 6.9298  | 3.0945   |
| C 6.5742  | -6.1783 | 6.7536   | C -11.8206 | 2.8441   | -1.1889  | C 4.7569   | 5.6882  | -1.5769 | Co 6.7516  | 6.4415  | 1.0014   |
| C 7.8587  | -6.3697 | 4.9584   | C -12.8473 | 2.3266   | -0.2733  | C 5.8352   | 8.254   | 6.6     | Co -4.0352 | -6.7241 | -4.1007  |
| C 8.982   | -6.5581 | 4.0295   | C -10.1491 | 3.7029   | -4.3584  | C 4.686    | 7.6301  | 7.0166  | Co -0.9727 | -6.2787 | -5.497   |
| C 6.0343  | -6.1103 | 8.1492   | C -1.7571  | 4.347    | -10.8587 | C 5.8628   | 8.2262  | 5.2365  | Co 3.8689  | -5.8284 | 5.6143   |
| C -3.8408 | -7.7793 | -8.0454  | C -0.6079  | 4.9709   | -11.2753 | C 7.4223   | -1.0212 | 0.4656  | Co -6.6632 | -6.2358 | -2.0075  |
| C -4.5522 | -7.4392 | -6.922   | C -1.7847  | 4.3748   | -9.495   | C 6.8895   | 8.7437  | 4.3211  | H 3.2241   | -9.8719 | 8.3751   |
| C -2.5198 | -7.5458 | -7.798   | C -2.8115  | 3.8573   | -8.5796  | C 4.1913   | 7.3675  | 8.4062  | H 0.5205   | -7.7491 | 9.5902   |
| C -1.3649 | -7.7306 | -8.6881  | C -0.1132  | 5.2335   | -12.6647 | C -5.8522  | 6.9296  | -7.765  | H 1.7841   | -7.8222 | 10.5154  |
| C -6.0299 | -7.4774 | -6.6719  | C -2.8679  | 7.2147   | -1.3153  | C -6.4404  | 6.3692  | -6.6589 | H 1.1647   | -9.1375 | 9.929    |
| C -1.9377 | -4.5701 | 5.2025   | C -2.1566  | 6.8746   | -2.4386  | C -4.5158  | 7.0501  | -7.5198 | H 4.1756   | -9.6693 | 5.3787   |
| C -2.5259 | -5.1304 | 6.3086   | C -4.1889  | 6.9813   | -1.5627  | C -3.4574  | 7.5712  | -8.3965 | H 5.3056   | -9.546  | 6.4583   |
| C -0.6013 | -4.4495 | 5.4477   | C -1.3238  | 7.1196   | 0.5312   | C -7.8729  | 6.0003  | -6.422  | H 5.0463   | -8.368  | 5.4569   |
| C -3.409  | -5.0069 | 3.3458   | C -5.3438  | 7.1661   | -0.6726  | C 4.5066   | 3.0885  | 1.6558  | H 4.0758   | 10.2258 | 8.7581   |
| C 0.4571  | -3.9284 | 4.5709   | C -2.5107  | 8.9587   | 0.438    | C 5.6625   | 3.7042  | 1.246   | H -1.5526  | 7.4113  | 9.8792   |
| C -2.7588 | -2.9216 | 3.5138   | C -0.6788  | 6.9128   | -2.6817  | C 3.0668   | -9.0178 | 8.0423  | H -0.3503  | 7.7862  | 10.8128  |
| C -3.9584 | -5.4993 | 6.5453   | C 0.146    | 7.5563   | 2.3891   | C 3.7273   | 4.0196  | 2.2777  | H -1.3029  | 8.9081  | 10.2729  |
| C -4.9516 | -4.9116 | 1.948    | C 1.4183   | 7.2797   | 1.9553   | C 2.4088   | 3.8527  | 2.9052  | H 1.4314   | 10.3981 | 5.7611   |
| C -6.1008 | -5.5355 | 1.1946   | C 0.1338   | 7.4711   | 3.7505   | C 3.1751   | 1.2027  | 0.6998  | H 2.5586   | 10.5424 | 6.8412   |
| C -4.924  | -4.9394 | 0.1345   | C -0.9894  | 7.6595   | 4.6794   | C 6.8548   | 3.1287  | 0.5447  | H 2.6198   | 9.3763  | 5.7951   |
| C -3.8973 | -4.4218 | -0.781   | C -1.6444  | 9.0569   | 1.5027   | C 3.6506   | -8.467  | 6.9291  | H 5.7905   | 8.0352  | 2.2985   |
| C -3.6251 | -3.0198 | 2.449    | C 1.9583   | 7.2117   | 0.5596   | C 2.1574   | -7.1526 | 2.1089  | H 3.4469   | -3.572  | 3.5388   |
| C -6.5955 | -5.7981 | 3.304    | C -6.5096  | 1.6965   | -4.3451  | C 3.0066   | -6.5287 | 1.6922  | H 7.2532   | -3.412  | 2.142    |
| C 8.0982  | -3.0394 | -3.1038  | C -7.2141  | 2.0284   | -3.2151  | C 2.1298   | -7.1248 | 3.4723  | H 2.9807   | -2.1563 | 3.0526   |
| C 7.5099  | -3.5997 | -1.9977  | C -5.9402  | 2.8332   | -4.8395  | C 0.6148   | -7.0573 | 0.2611  | H 8.2853   | -0.7894 | 0.2472   |
| C 9.4346  | -2.9188 | -2.8586  | C -6.0171  | -0.6559  | -4.1818  | C 1.103    | -7.6423 | 4.3878  | H 7.8092   | -0.4289 | 1.1147   |
| C 6.6268  | -3.4762 | -4.9605  | C -5.0771  | 2.999    | -6.0175  | C 0.8309   | -9.0444 | 1.1577  | H 6.978    | -0.5066 | -0.2122  |
| C 10.4929 | -2.3977 | -3.7353  | C -6.8718  | -0.0415  | -6.1033  | C 3.8013   | -6.2661 | 0.3027  | H 8.1144   | -1.5509 | 0.0632   |
| C 7.277   | -1.3909 | -4.7925  | C -7.9944  | 1.152    | -2.2838  | C 2.2157   | -8.0949 | 8.5759  | H 2.3564   | 4.4022  | 3.6908   |
| C 6.0774  | -3.9686 | -1.761   | C 5.1551   | -1.6543  | 1.5654   | C -0.8565  | -7.4941 | -1.5955 | H 1.724    | 4.1142  | 2.2854   |
| C 0.5518  | 9.3739  | 8.3928   | C -5.861   | -3.0463  | -4.4355  | C -0.2683  | -6.9338 | -2.7018 | H 2.2848   | 2.9326  | 3.1496   |
| C 5.0843  | -3.3809 | -6.8083  | C -6.4448  | -3.5972  | -3.3224  | C -2.193   | -7.6147 | -1.8409 | H 2.4876   | 1.68    | 0.2943   |
| C 3.935   | -4.0048 | -6.3917  | C -5.01    | -3.9693  | -4.9692  | C -3.2513  | -8.1358 | -0.9642 | H 7.3897   | 2.6382  | 1.1732   |
| C 5.1118  | -3.4087 | -8.1718  | C -4.1401  | -3.8532  | -6.1481  | C -0.0354  | -9.1426 | 0.093   | H 6.5614   | 2.5395  | -0.1542  |
| C 6.1386  | -2.8912 | -9.0873  | C -6.6854  | -1.4048  | -6.1292  | C 1.1642   | -6.5649 | -2.9385 | H 7.3773   | 3.8394  | 0.1659   |
| C 6.4107  | -1.4891 | -5.8573  | C -7.4269  | -2.9978  | -2.3628  | C 1.3459   | -8.211  | 9.7548  | H 0.7344   | -6.1529 | 0.0805   |
| C 3.4403  | -4.2674 | -5.0022  | C 6.4318   | -1.9214  | 1.1388   | C 1.0466   | -4.2849 | 11.6521 | H 1.0142   | -7.0489 | 5.1373   |
| C 1.2563  | 9.0419  | 7.2628   | C 2.0865   | -8.8792  | -6.2649  | C 1.7579   | -4.625  | 10.5288 | H 1.3608   | -8.5135 | 4.6981   |
| C -0.8477 | 2.4818  | -4.9252  | C 0.8098   | -8.6121  | -5.8383  | C -0.2744  | -4.5183 | -4.5183 | H 0.2636   | -7.7025 | 3.9261   |
| C -0.2639 | 3.0326  | -6.0383  | C 2.5841   | -7.7506  | -6.8476  | C -1.4293  | -4.3336 | 12.2949 | H 1.1156   | -9.7354 | 1.7115   |
| C -1.6988 | 3.4047  | -4.3915  | C 3.8958   | -7.534   | -7.4741  | C 3.2357   | -4.5868 | 10.2857 | H 3.3154   | -5.5298 | -0.0761  |
| C -0.6917 | 0.0913  | -5.1787  | C -0.1806  | -9.5124  | -5.1652  | C 4.6327   | -9.0664 | 5.9696  | H 3.6689   | -7.0487 | -0.2374  |
| C -2.5686 | 3.2886  | -3.2126  | C -0.4285  | 9.5125   | -5.9143  | C 11.0824  | -2.7542 | 3.3458  | H 4.7366   | -6.0514 | 0.3312   |
| C -0.0233 | 0.8402  | -3.2313  | C -1.5845  | 8.9868   | -5.5046  | C 11.7938  | -3.0943 | 2.2225  | H -4.0531  | -7.6232 | -1.091   |
| C 0.7182  | 2.4333  | -6.9977  | C 0.3508   | 8.5815   | -6.5363  | C 9.7614   | -2.9877 | 3.0985  | H -3.4218  | -9.0554 | -1.1803  |
| C -0.0176 | 8.2371  | 8.8872   | C 1.6692   | 8.7484   | -7.1639  | C 8.6066   | -2.8029 | 3.9886  | H -2.9703  | -8.069  | -0.0487  |
| C -0.1991 | -2.261  | -5.0156  | C 4.6575   | -2.7829  | 2.148    | C 13.2715  | -3.0561 | 1.9794  | H -0.4536  | -9.9132 | -0.2173  |
| C 0.5053  | -2.593  | -6.1455  | C -2.7767  | 9.4723   | -4.8034  | C -10.6408 | -5.6093 | -2.7128 | H 1.3664   | -5.7507 | -2.4718  |
| C -0.7685 | -3.3978 | -4.5211  | C -6.1038  | 3.5141   | 1.6586   | C -9.3684  | -5.8859 | -3.1467 | H 1.7332   | -7.268  | -2.6166  |
| C -1.6316 | -3.5636 | -3.3432  | C -7.3761  | 3.7906   | 2.0923   | C -10.6529 | -5.6945 | -1.3516 | H 1.3112   | -6.4396 | -3.8789  |



## IR analysis

The ex-situ IR spectroscopic studies of  $\text{NH}_3$  sorption in **JCM-1** and **JCM-1(Cl<sup>-</sup>)** were carried out in a glove box. The IR spectra of the MOFs before and after  $\text{NH}_3$  adsorption were recorded at room temperature in attenuated total reflectance (ATR) mode on Bruker *ALPHA*. Black lines are spectra of the as-prepared samples and red lines are spectra of the  $\text{NH}_3$ -adsorbed samples. The peaks corresponding to imidazolium C-H stretching region ( $2900\sim 3100\text{ cm}^{-1}$ )<sup>[1]</sup> were blue-shifted and new peaks were appeared whilst other peaks from the framework remained intact. The broad peaks around  $3200\sim 3400\text{ cm}^{-1}$  in Figure S9a and S9b are  $\text{NH}_3$  peaks adsorbed in the frameworks.

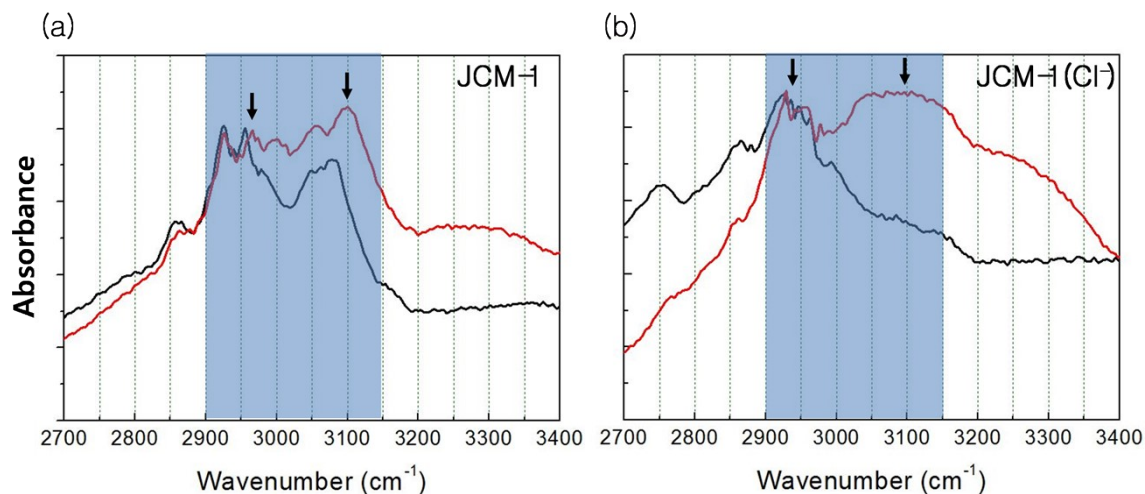

**Fig. S6** IR spectra of a) **JCM-1** and b) **JCM-1(Cl<sup>-</sup>)** before (black line) and after (red line)  $\text{NH}_3$  exposure. Broad peaks around  $3200\sim 3400\text{ cm}^{-1}$  are N-H stretch peaks of adsorbed  $\text{NH}_3$  (black line: before exposure to  $\text{NH}_3$ , red line: after exposure to  $\text{NH}_3$ ).



## Breakthrough experiments

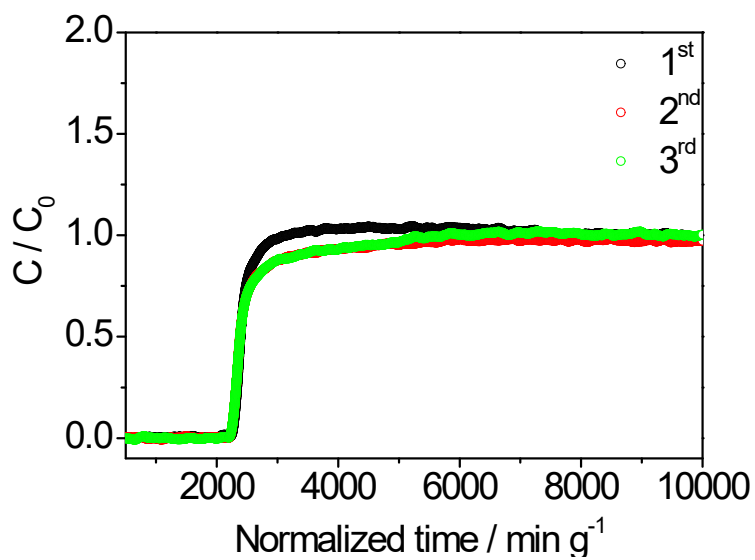

**Fig. S7** Breakthrough curves of calculating ammonia breakthrough capacity in **JCM-1** at dry 1000 ppm ( $\text{NH}_3$ : 0.1%). 1<sup>st</sup> = 0.307 mmol g<sup>-1</sup> (activation - 120 °C 10 h under He flowing), 2<sup>nd</sup> = 0.385 mmol g<sup>-1</sup> (activation - 25 °C 10 h under He flowing), 3<sup>rd</sup> = 0.409 mmol g<sup>-1</sup> (activation - 25 °C 10 h under He flowing).

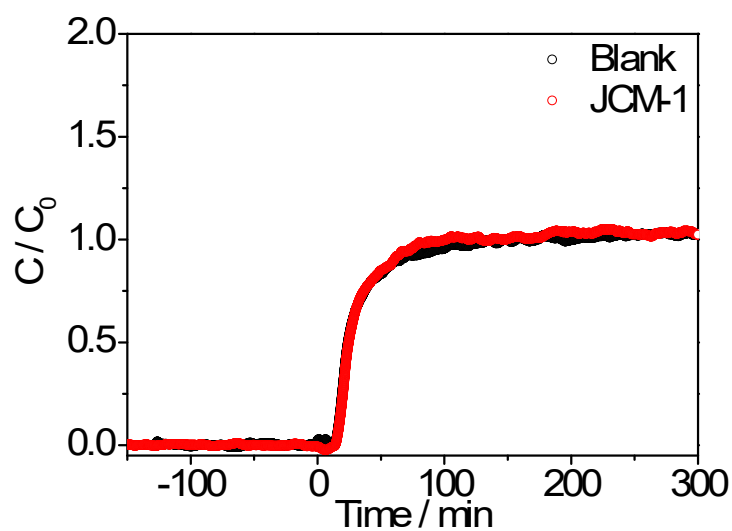

**Fig. S8** Breakthrough curves of calculating ammonia breakthrough capacity in **JCM-1** at 80% RH and 1000 ppm ( $\text{NH}_3\%$ : 0.1%). 1<sup>st</sup> = 0  $\text{mmol g}^{-1}$  (activation - 120 °C 10 h under He flowing).

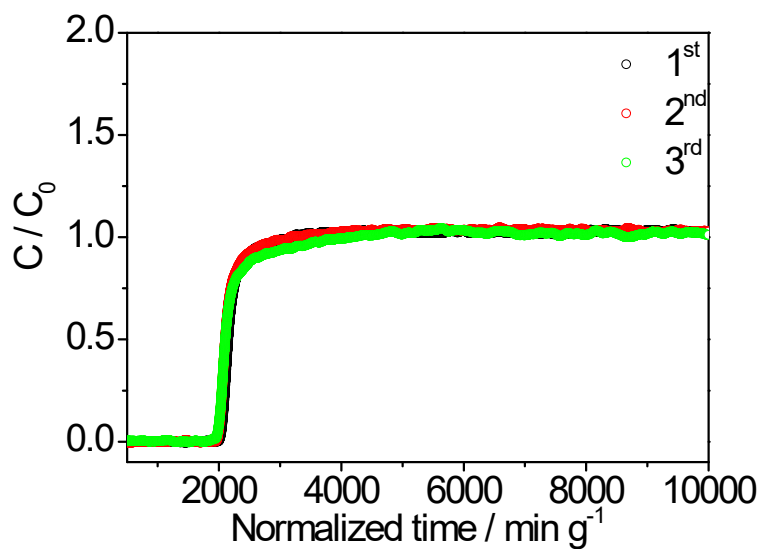

**Fig. S9** Breakthrough curves of calculating ammonia breakthrough capacity in **JCM-1(Cl)** at dry 1000 ppm ( $\text{NH}_3\%$ : 0.1%). 1<sup>st</sup> = 0.475  $\text{mmol g}^{-1}$  (activation - 120 °C 10 h under He flowing), 2<sup>nd</sup> = 0.415  $\text{mmol g}^{-1}$  (activation - 25 °C 10 h under He flowing), and 3<sup>rd</sup> = 0.485  $\text{mmol g}^{-1}$  (activation - 25 °C 10 h under He flowing).

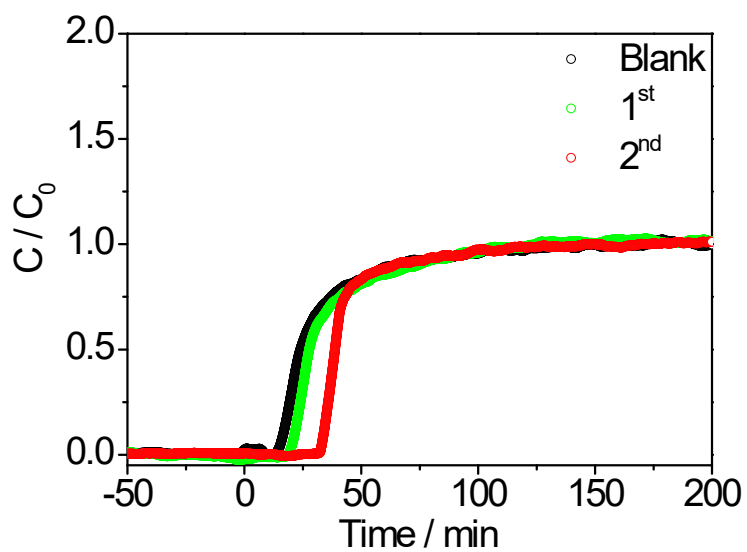

**Fig. S10** Breakthrough curves of calculating ammonia breakthrough capacity in **JCM-1(Cl)** at 80% RH and 1000 ppm ( $\text{NH}_3\%$ : 0.1%). 1<sup>st</sup> = 0.213 mmol g<sup>-1</sup> (activation - 120 °C 10 h under He flowing) and 2<sup>nd</sup> = 0.318 mmol g<sup>-1</sup> (activation - 25 °C 10 h under He flowing).

**Table S3. The summary of the NH<sub>3</sub> adsorption uptake amounts with various MOFs**

| Adsorbents                                 | NH <sub>3</sub> uptake amounts<br>(mmol g <sup>-1</sup> ) | Uptake condition<br>at 1 bar | Reference        |
|--------------------------------------------|-----------------------------------------------------------|------------------------------|------------------|
| <b>JCM-1(Cl<sup>-</sup>)</b>               | <b>11.7</b>                                               | <b>273 K</b>                 | <b>This work</b> |
|                                            | <b>7.2</b>                                                | <b>298 K</b>                 |                  |
| <b>JCM-1</b>                               | <b>7.7</b>                                                | <b>273 K</b>                 | <b>This work</b> |
|                                            | <b>5.7</b>                                                | <b>298 K</b>                 |                  |
| Mg-MOF-74                                  | ~16                                                       | 298 K                        | [2]              |
| Al-BTB                                     | ~6                                                        | 298 K                        | [2]              |
| MIL-53(Al)                                 | 4.28                                                      | 298 K                        | [2]              |
| ZIF-8                                      | 1.2                                                       | 298 K                        | [2]              |
| HKUST-1                                    | 12.1                                                      | 301 K, 1.2 bar               | [3]              |
|                                            | ~6.0                                                      |                              | [4]              |
| HKUST-1/GO                                 | ~5.4                                                      | 313 K                        | [4]              |
| MIL-100(Al)                                | 8                                                         | 298 K                        | [5]              |
| NH <sub>2</sub> -MIL-53                    | 8                                                         | 298 K                        | [5]              |
| MIL-53                                     | 4.4                                                       | 298 K                        | [5]              |
| MIL-101(Cr)                                | 10.0                                                      | 298 K                        | [5]              |
| DUT-6-(OH) <sub>2</sub>                    | 16.4                                                      | 298 K                        | [6]              |
| DUT-6                                      | 12                                                        | 298 K                        | [6]              |
| NU-300                                     | 8.28                                                      | 298 K                        | [7]              |
| Al-PMOF                                    | 7.67                                                      | 298 K                        | [8]              |
| Ga-PMOF                                    | 10.50                                                     | 298 K                        | [8]              |
| In-PMOF                                    | 9.41                                                      | 298 K                        | [8]              |
| NU-1401                                    | 8.41                                                      | 298 K                        | [9]              |
| Mg <sub>2</sub> (dobpdc)                   | 23.90                                                     | 298 K                        | [10]             |
| Ni <sub>2</sub> (dobpdc)                   | 20.82                                                     | 298 K                        | [10]             |
| Zn <sub>2</sub> (dobpdc)                   | 15.24                                                     | 298 K                        | [10]             |
| Co <sub>2</sub> (dobpdc)                   | 13.34                                                     | 298 K                        | [10]             |
| Mn <sub>2</sub> (dobpdc)                   | 13.26                                                     | 298 K                        | [10]             |
| CoHCC                                      | 21.9                                                      | 298 K                        | [11]             |
| CuHCF                                      | 20.2                                                      | 298 K                        | [11]             |
| PB                                         | 12.5                                                      | 298 K                        | [11]             |
| Co <sub>2</sub> Cl <sub>2</sub> BBTA       | 17.95                                                     | 298 K                        | [12]             |
| Cu <sub>2</sub> Cl <sub>2</sub> BBTA       | 19.79                                                     | 298 K                        | [12]             |
| Ni <sub>2</sub> Cl <sub>2</sub> BBTA       | 14.68                                                     | 298 K                        | [12]             |
| [Zn <sub>2</sub> (L1) <sub>2</sub> (bpe)]  | 17.8                                                      | 273 K                        | [13]             |
| [Zn <sub>2</sub> (L1) <sub>2</sub> (bipy)] | 14.3                                                      | 273 K                        | [13]             |
| Zn(NA) <sub>2</sub>                        | 10.2                                                      | 298 K                        | [14]             |
| Co(NA) <sub>2</sub>                        | 17.5                                                      | 298 K                        | [14]             |
| Cu(NA) <sub>2</sub>                        | 13.4                                                      | 298 K                        | [14]             |
| Cd(NA) <sub>2</sub>                        | 6                                                         | 298 K                        | [14]             |
| Mn <sub>2</sub> Cl <sub>2</sub> BTDD       | 15.47                                                     | 298 K                        | [15]             |
| Co <sub>2</sub> Cl <sub>2</sub> BTDD       | 12                                                        | 298 K                        | [15]             |
| Ni <sub>2</sub> Cl <sub>2</sub> BTDD       | 12.02                                                     | 298 K                        | [15]             |
| UiO-66-NH <sub>2</sub>                     | 9.84                                                      | 298 K                        | [15]             |
| UiO-66-A                                   | 5.74                                                      | 298 K                        | [16]             |
| UiO-66-B                                   | 6.81                                                      | 298 K                        | [16]             |
| UiO-66-C                                   | 8.27                                                      | 298 K                        | [16]             |
| MOF-5                                      | 12.2                                                      | 298 K, 1.06 bar              | [17]             |
| MOF-177                                    | 12.2                                                      | 298 K, 1.06 bar              | [17]             |
| MOS-1                                      | 11.5                                                      | 298 K                        | [18]             |
| MOS-2                                      | 5.2                                                       | 298 K                        | [18]             |
| MOS-3                                      | 3.8                                                       | 298 K                        | [18]             |
| Cu(INA) <sub>2</sub>                       | 12.5                                                      | 298 K                        | [19]             |
| Co-2(INA)                                  | ~13                                                       | 298 K                        | [19]             |
| Ni-2(INA)                                  | ~13                                                       | 298 K                        | [19]             |
| Cd-2(INA)                                  | ~12                                                       | 298 K                        | [19]             |

|                                                      |      |                |      |
|------------------------------------------------------|------|----------------|------|
| Zn(INA) <sub>2</sub>                                 | 6    | 298 K          | [20] |
| ELM-12                                               | 6.1  | 298 K          | [21] |
| Fe-MIL-101-SO <sub>3</sub> H                         | 17.8 | 298 K          | [22] |
| MFM-300(V <sup>IV</sup> )                            | 17.3 | 298 K          | [23] |
| MFM-300(Fe)                                          | 16.1 | 298 K          | [23] |
| MFM-300(V <sup>III</sup> )                           | 15.6 | 298 K          | [23] |
| MFM-300(Cr)                                          | 14.0 | 298 K          | [23] |
| Ni <sub>2</sub> (adc) <sub>2</sub> (dabco)           | 12.1 | 298 K          | [24] |
| Co <sub>2</sub> (adc) <sub>2</sub> (dabco)           | 11.2 | 298 K          | [24] |
| Zn <sub>2</sub> (adc) <sub>2</sub> (dabco)           | 8.3  | 298 K          | [24] |
| Cu <sub>2</sub> (adc) <sub>2</sub> (dabco)           | 6.5  | 298 K          | [24] |
| SION105-Eu                                           | 5.7  | 303 K          | [25] |
| ECUT-36                                              | 3.6  | 298 K          | [26] |
| MFM-300(Al)                                          | 15.7 | 298 K          | [27] |
| MFM-303(Al)                                          | 9.9  | 273 K          | [28] |
| UiO-67                                               | 8.40 | 298 K, 1.1 bar | [29] |
| UiO-bpydc                                            | 8.4  | 298 K          | [29] |
| PFC-27                                               | ~4.7 | 298 K          | [30] |
| PFC-27/CH <sub>3</sub> COO <sup>-</sup>              | ~8.5 | 298 K          | [30] |
| PFC-27/CF <sub>3</sub> COO <sup>-</sup>              | ~8.8 | 298 K          | [30] |
| PFC-27/CFH <sub>3</sub> SO <sub>3</sub> <sup>-</sup> | 10.4 | 298 K          | [30] |

## References

- [1] S. Cha, M. Ao, W. Sung, B. Moon, B. Ahlstrom, P. Johansson, Y. Ouchi, D. Kim, *Phys. Chem. Chem. Phys.* **2014**, *16*, 9591-9601.
- [2] T. Kajiwara, M. Higuchi, D. Watanabe, H. Higashimura, T. Yamada, H. Kitagawa, *Chem. Eur. J.* **2014**, *20*, 15611-15617.
- [3] C. Petit, L. Huang, J. Jagiello, J. Kenvin, K. E. Gubbins, T. J. Bandosz, *Langmuir* **2011**, *27*, 13043-13051.
- [4] C. Petit, S. Wrabetz, T. J. Bandosz, *J. Mater. Chem.* **2012**, *22*, 21443-21447.
- [5] Y. Chen, F. Zhang, Y. Wang, C. Yang, J. Yang, J. Li, *Microporous Mesoporous Mater.* **2018**, *258*, 170-177.
- [6] I. Spanopoulos, P. Xydias, C. D. Malliakas, P. N. Trikalitis, *Inorg. Chem.* **2013**, *52*, 855-862.
- [7] Y. Chen, X. Zhang, K. Ma, Z. Chen, X. Wang, J. Knapp, S. Alayoglu, F. Wang, Q. Xia, Z. Li, T. Islamoglu, O. K. Farha, *ACS Appl. Nano Mater.* **2019**, *2*, 6098-6102.
- [8] S. Moribe, Z. Chen, S. Alayoglu, Z. H. Syed, T. Islamoglu, O. K. Farha, *ACS Mater. Lett.* **2019**, *1*, 476-480.
- [9] Y. Zhang, X. Zhang, Z. Chen, K. I. Otake, G. W. Peterson, Y. Chen, X. Wang, L. R. Redfern, S. Goswami, P. Li, T. Islamoglu, B. Wang, O. K. Farha, *ChemSusChem* **2020**, *13*, 1710-1714.
- [10] D. W. Kim, D. W. Kang, M. Kang, J.-H. Lee, J. H. Choe, Y. S. Chae, D. S. Choi, H. Yun and C. S. Hong, *Angew. Chem. Int. Ed.* **2020**, *59*, 22531-22536.
- [11] A. Takahashi, H. Tanaka, D. Parajuli, T. Nakamura, K. Minami, Y. Sugiyama, Y. Hakuta, S. Ohkoshi, T. Kawamoto, *J. Am. Chem. Soc.* **2016**, *138*, 6376-6379.
- [12] A. J. Rieth, M. Dinca, *J. Am. Chem. Soc.* **2018**, *140*, 3461-3466.
- [13] S. Glomb, D. Woschko, G. Makhloufi, C. Janiak, *ACS Appl. Mater. Interfaces* **2017**, *9*, 37419-37434.
- [14] Y. Chen, B. Shan, C. Yang, J. Yang, J. Li, B. Mu, *J. Mater. Chem. A* **2018**, *6*, 9922-9929.
- [15] A. J. Rieth, Y. Tulchinsky, M. Dinca, *J. Am. Chem. Soc.* **2016**, *138*, 9401-9404.
- [16] W. Morris, C. J. Doonan, O. M. Yaghi, *Inorg. Chem.* **2011**, *50*, 6853-6855.
- [17] D. Saha, S. Deng, J., *Colloid Interface Sci.* **2010**, *348*, 615-620.
- [18] Y. Chen, Y. Wang, C. Yang, S. Wang, J. Yang, J. Li, *ACS Sustain. Chem. Eng.* **2017**, *5*, 5082-5089.
- [19] Y. Chen, L. Li, J. Li, K. Ouyang, J. Yang, *J. Hazard. Mater.* **2016**, *306*, 340-347.
- [20] Y. Chen, C. Yang, X. Wang, J. Yang, K. Ouyang, J. Li, *J. Mater. Chem. A* **2016**, *4*, 10345-10351.
- [21] L. Li, Y. Wang, J. Yang, Y. Chen, J. Li, *ChemPlusChem* **2016**, *81*, 222-228.
- [22] J. F. Van Humbeck, T. M. McDonald, X. Jing, B. M. Wiers, G. Zhu, and J. R. Long, *J. Am. Chem. Soc.* **2014**, *136*, 2432.
- [23] X. Han, W. Lu, Y. Chen, I. Silva, J. Li, L. Lin, W. Li, A. M. Sheveleva, H. G. W. Godfrey, Z. Lu, F. Tuna, E. J. L. McInnes, Y. Cheng, L. L. Daemen, L. J. M. McPherson, S. J. Teat, M. D. Frogley, S. Rudic, P. Manuel, A. J. Ramirez-cuesta, S. Yang and M. Schröder, *J. Am. Chem. Soc.* **2021**, *143*, 3153-3161.
- [24] Z. Cao, K. N. Landström, F. Akhtar, *Catalysts* **2020**, *10*, 1444-1454.
- [25] T. N. Nguyen, I. M. Harreschou, J. H. Lee, K. C. Stylianou, D. W. Stephan, *Chem. Commun.* **2020**, *56*, 9600.
- [26] L. J. Sun, Y. L. Fan, M. J. Yin, H. P. Zhang, H. Feng, L. J. Guo, F. Luo, *Cryst. Growth Des.* **2020**, *20*, 3605-3610.
- [27] H. G. W. Godfrey, I. da Silva, L. Briggs, J. H. Carter, C. G. Morris, M. Savage, T. L. Easun, P. Manuel, C. A. Murray, C. C. Tang, M. D. Frogley, G. Cinque, S. Yang, M. Schröder, *Angew. Chem. Int. Ed.* **2018**, *57*, 14778-14781.
- [28] C. Marsh, X. Han, J. Li, Z. Lu, S. P. Argent, I. da Silva, Y. Cheng, L. L. Daemen, A. J. Ramirez-Cuesta, S. P. Thompson, A. J. Blake, S. Yang and M. Schröder, *J. Am. Chem. Soc.* **2021**, *143*, 6586-6592.
- [29] T. Yoskamtorn, P. Zhao, X.-P. Wu, K. Purchase, F. Orlandi, P. Manuel, J. Taylor, Y. Li, S. Day, L. Ye, C. C. Tang, Y. Zhao, S. C. E. Tsang, *J. Am. Chem. Soc.* **2021**, *143*, 3205-3218.
- [30] M. K. Matikolaie and E. Binaeian, *ACS Appl. Mater. Interfaces* **2021**, *13*, 27159-27168.
